# Supplementary material for: Catalytic activity of γ-Al2O3(110) in the NO + H2 reaction: a DFT study
Source: Royal Society of Chemistry journal article supplement (doi:10.1039/d3cp02909c), 2023-01-01
Supplement: d3cp02909c1.pdf [file d3cp02909c1.pdf]

## Catalytic activity of $\gamma$ -Al<sub>2</sub>O<sub>3</sub>(110) in the NO+H<sub>2</sub> reaction: a DFT study

Alexander Cholach

Boreskov Institute of Catalysis, Novosibirsk 630090, Russian Federation

E-mail: [cholach@catalysis.ru](mailto:cholach@catalysis.ru)

### Supplementary material

- (a) The terminations of  $\gamma$ -Al<sub>2</sub>O<sub>3</sub>(110); Figure S(a) and Table S(a)
- (b) Adsorbed states of NO (bound via O) on  $\gamma$ -Al<sub>2</sub>O<sub>3</sub>(110); Figure S(b)
- (c) Catalytic reaction of H<sub>2</sub> + O<sub>2</sub> on noble metals (from References 26, 27)
- (d) Absorption of NO and H<sub>2</sub> in bulk  $\gamma$ -Al<sub>2</sub>O<sub>3</sub>; Table S(d)
- (e) Atomic coordinates of optimized configurations; Tables S1-S8 (the Table number in the supplementary material corresponds to the number of the Figure in the article)

### References

20. M. Digne, P. Sautet, P. Raybaud, P. Euzen, H. Toulhoat, Use of DFT to achieve a rational understanding of acid-basic properties of  $\gamma$ -alumina surfaces, *J. Catal.*, 2004, **226**, 54.
21. J. Gu, J. Wang, J. Leszczynski, Structure and energetics of (111) surface of  $\gamma$ -Al<sub>2</sub>O<sub>3</sub>: insights from DFT including periodic boundary approach, *ACS Omega*, 2018, **3**, 1881.
22. J. Gu, J. Wang, J. Leszczynski, Single site Fe on the (110) surface of  $\gamma$ -Al<sub>2</sub>O<sub>3</sub>: insights from a DFT study including the periodic boundary approach, *Phys. Chem. Chem. Phys.*, 2021, **23**, 7164.
26. V. V. Gorodetskii, V. A. Sobyenin, A. R. Cholach, M. Y. Smirnov, Low-temperature oxidation of hydrogen on iridium, platinum, palladium and rhodium surfaces, Proc. 8<sup>th</sup> Intern. Congr. Catal., Vol. 3, (Berlin, Verlag Chemie, 1985).
27. V. A. Sobyenin, G. K. Boreskov, A. R. Cholach, Kinetics of hydrogen oxidation on platinum (111), (110) and (100) single crystals. Proc. USSR Academy of Sciences, 1984, **279**, 1410.
35. H. P. Pinto, R. M. Nieminen, S. D. Elliott, Ab initio study of  $\gamma$ -Al<sub>2</sub>O<sub>3</sub> surfaces, *Phys. Rev. B*, 2004, **70**, 125402.

### (a) The terminations of $\gamma\text{-Al}_2\text{O}_3(110)$

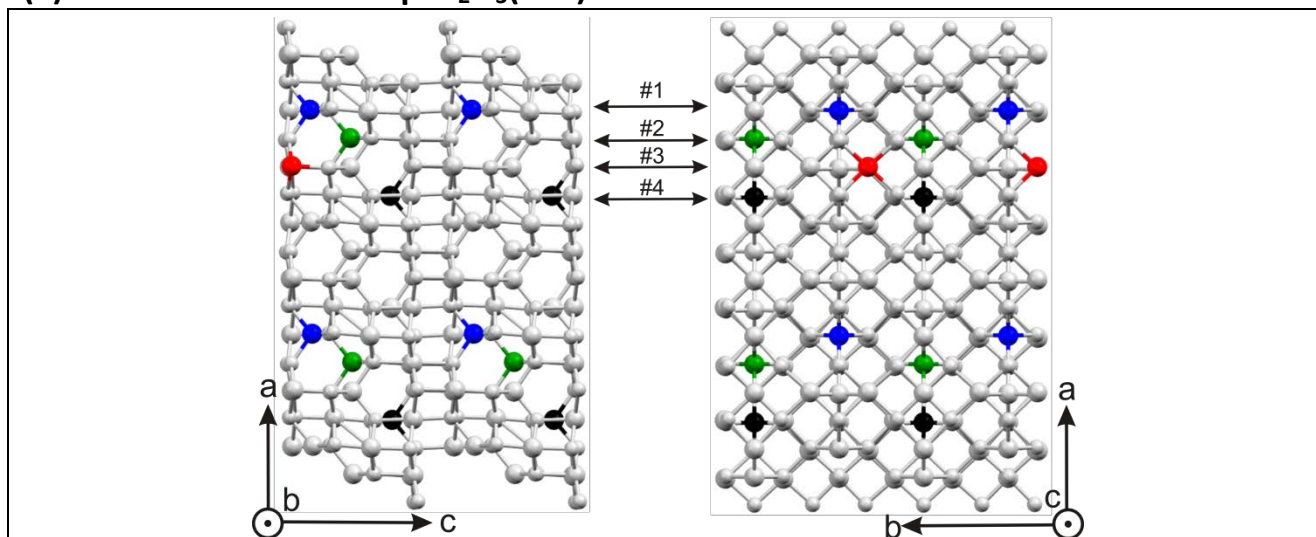

**FIG. S(a).** Side views of the bulk (110)-oriented supercell  $\gamma\text{-Al}_{32}\text{O}_{48}\text{-}2\times 2\times 4$  (Al - large and O - small spheres); the colored Al atoms denote the corners of the  $1\times 1$   $\text{Al}_{32}\text{O}_{48}$  unit cell for the terminations #1-#4 faces (110) in Table S(a).1; atomic coordinates are given in Table S(a).2.

Table S(a).1 compares the surface energies obtained in this paper using a non-local plane wave basis set with the literature data. It is important to note that the surface energies calculated using localized basis sets are always much larger than those calculated using a non-localized plane wave basis.<sup>20-22,35</sup>

**Table S(a).1.** Surface energies for options #1 ÷ #4 of face selection (110) in Fig. S(a) (J/m<sup>2</sup>)

| Configuration           | #1 (used)   | #2          | #3          | #4          | Basis set                |
|-------------------------|-------------|-------------|-------------|-------------|--------------------------|
| Non-optimized/optimized | 2.561/1.548 | 3.064/1.753 | 3.525/1.948 | 3.064/1.753 | Plane wave (this work)   |
| Optimized               | 1.760       |             |             |             | Plane wave <sup>21</sup> |
| Optimized               | 1.540       |             |             |             | Plane wave <sup>20</sup> |
| Optimized               | 1.530       |             |             |             | Plane wave <sup>35</sup> |
| Non-optimized/optimized | 3.739/2.961 | 4.259/3.233 | 4.791/3.592 |             | Localized <sup>22</sup>  |
| Non-optimized/optimized | 3.355/2.559 |             |             |             | Localized <sup>21</sup>  |

**Table S(a).2. Bulk (110)-oriented  $\gamma$ -Al<sub>32</sub>O<sub>48</sub> in Fig. S(a)**

| #  |    | X           | Y           | Z            | #  |           | X            | Y            | Z            |
|----|----|-------------|-------------|--------------|----|-----------|--------------|--------------|--------------|
| 1  | O  | 7.159796223 | 3.315816017 | 2.081512468  | 41 | Al        | 3.880240318  | 2.005338711  | 7.555224472  |
| 2  | O  | 7.159808249 | 0.694914971 | 2.081507542  | 42 | Al        | 3.931214743  | 2.005340262  | 1.972116739  |
| 3  | O  | 7.210770390 | 3.315817737 | -3.501595074 | 43 | Al        | 2.988301896  | 7.677560386  | 6.243020933  |
| 4  | O  | 7.210782406 | 0.694916616 | -3.501600044 | 44 | Al        | 2.988318271  | 4.741396220  | 6.243023378  |
| 5  | O  | 7.062991129 | 6.209507315 | 4.732841903  | 45 | Al        | 3.039276280  | 7.677562120  | 0.659913298  |
| 6  | O  | 7.113965680 | 6.209509033 | -0.850265606 | 46 | Al        | 3.039292886  | 4.741398027  | 0.659915920  |
| 7  | O  | 6.974843983 | 6.209505856 | 2.050429277  | 47 | O         | 2.995499542  | 3.417157318  | 4.912742715  |
| 8  | O  | 7.025818355 | 6.209507538 | -3.532678415 | 48 | O         | 2.995514799  | 0.593509763  | 4.912736671  |
| 9  | Al | 6.951905681 | 2.005362668 | 3.401151896  | 49 | O         | 3.046474212  | 3.417159168  | -0.670364844 |
| 10 | Al | 7.002879955 | 2.005364294 | -2.181955674 | 50 | O         | 3.046489221  | 0.593511636  | -0.670370952 |
| 11 | Al | 6.925097757 | 2.005366434 | 6.179281762  | 51 | O         | 2.862210698  | 6.209477833  | 7.548936831  |
| 12 | Al | 6.976072317 | 2.005368190 | 0.596174155  | 52 | O         | 2.913185037  | 6.209479620  | 1.965829230  |
| 13 | Al | 6.856197502 | 7.649893791 | 3.360148601  | 53 | O         | 2.784099809  | 3.410578768  | 7.534455521  |
| 14 | Al | 6.856215157 | 4.769120873 | 3.360153851  | 54 | O         | 2.784109249  | 0.600093213  | 7.534445495  |
| 15 | Al | 6.907171815 | 7.649895489 | -2.222959172 | 55 | O         | 2.835074375  | 3.410580471  | 1.951347952  |
| 16 | Al | 6.907189562 | 4.769122677 | -2.222953692 | 56 | O         | 2.835083529  | 0.600094917  | 1.951337836  |
| 17 | O  | 6.773467112 | 3.316758633 | 4.702153508  | 57 | O         | 2.778816169  | 6.209477725  | 4.870719253  |
| 18 | O  | 6.773481642 | 0.693961804 | 4.702150376  | 58 | O         | 2.829790711  | 6.209479544  | -0.712388266 |
| 19 | O  | 6.824441800 | 3.316760262 | -0.880954068 | 59 | Al        | 1.931147438  | 2.005327994  | 4.856191946  |
| 20 | O  | 6.824455907 | 0.693963407 | -0.880957216 | 60 | Al        | 1.982121939  | 2.005329981  | -0.726915647 |
| 21 | Al | 5.886081618 | 6.209497200 | 6.145776963  | 61 | O         | 1.043745263  | 7.520869289  | 6.299817149  |
| 22 | Al | 5.937056138 | 6.209499037 | 0.562669369  | 62 | O         | 1.043761497  | 4.898073580  | 6.299823399  |
| 23 | O  | 5.038409926 | 2.005349095 | 6.131247142  | 63 | O         | 1.094719738  | 7.520870993  | 0.716709460  |
| 24 | O  | 5.089384471 | 2.005350713 | 0.548139558  | 64 | O         | 1.094735997  | 4.898075304  | 0.716715857  |
| 25 | O  | 5.033117204 | 7.614732346 | 3.467513568  | 65 | Al        | 0.961018874  | 3.445718195  | 7.641821963  |
| 26 | O  | 5.033134575 | 4.804244906 | 3.467512036  | 66 | Al        | 0.961028993  | 0.564944135  | 7.641811183  |
| 27 | O  | 5.084091608 | 7.614733982 | -2.115593977 | 67 | Al        | 1.011993423  | 3.445719913  | 2.058714410  |
| 28 | O  | 5.084108981 | 4.804246642 | -2.115595530 | 68 | Al        | 1.012003359  | 0.564945822  | 2.058703491  |
| 29 | O  | 4.955019551 | 2.005343758 | 3.453031085  | 69 | Al        | 0.892128465  | 6.209474232  | 4.822690028  |
| 30 | O  | 5.005994052 | 2.005345574 | -2.130076500 | 70 | Al        | 0.943103021  | 6.209475985  | -0.760417547 |
| 31 | O  | 4.821710952 | 7.621313145 | 6.089224169  | 71 | Al        | 0.865331510  | 6.209473214  | 7.600822004  |
| 32 | O  | 4.821726421 | 4.797669610 | 6.089219819  | 72 | Al        | 0.916305787  | 6.209474922  | 2.017714399  |
| 33 | O  | 4.872685335 | 7.621314916 | 0.506116692  | 73 | O         | 0.842387396  | 2.005327947  | 8.951538925  |
| 34 | O  | 4.872701057 | 4.797671343 | 0.506112243  | 74 | O         | 0.893361684  | 2.005329683  | 3.368431315  |
| 35 | Al | 4.828909300 | 3.473426630 | 4.758941248  | 75 | O         | 0.754236299  | 2.005329737  | 6.269126343  |
| 36 | Al | 4.828926724 | 0.537263592 | 4.758942016  | 76 | O         | 0.805210810  | 2.005331547  | 0.686018695  |
| 37 | Al | 4.879883957 | 3.473428349 | -0.824166265 | 77 | O         | 0.657420050  | 7.519924688  | 8.920459445  |
| 38 | Al | 4.879901108 | 0.537265284 | -0.824165512 | 78 | O         | 0.657435491  | 4.899022420  | 8.920465426  |
| 39 | Al | 3.936990663 | 6.209481381 | 3.446743300  | 79 | O         | 0.708394318  | 7.519926372  | 3.337351852  |
| 40 | Al | 3.987965048 | 6.209483118 | -2.136364303 | 80 | O         | 0.708409806  | 4.899024116  | 3.337357841  |
|    |    |             |             |              |    | <b>2a</b> | -0.101948677 | -3.43800E-06 | 11.166215185 |
|    |    |             |             |              |    | <b>b</b>  | -4.64020E-05 | 8.408287183  | 4.37540E-09  |
|    |    |             |             |              |    | <b>c</b>  | 8.077044348  | 4.25645E-05  | 3.78089E-09  |

## (b) Adsorbed states of NO (bound via O)

(a)  $\gamma\text{-Al}_2\text{O}_3(110)\text{-}1\times 1$

(b)  $Q_{\text{NO}} = 0.27 \text{ eV}$ ;  $d_{\text{AlO}} = 2.188 \text{ \AA}$   
 $d_{\text{NO}} = 1.171 \text{ \AA}$ ;  $\angle\text{AlON} = 125.7^\circ$

(c)  $Q_{\text{NO}} = 0.12 \text{ eV}$ ;  $d_{\text{AlO}} = 2.479 \text{ \AA}$   
 $d_{\text{NO}} = 1.164 \text{ \AA}$ ;  $\angle\text{AlON} = 127.7^\circ$

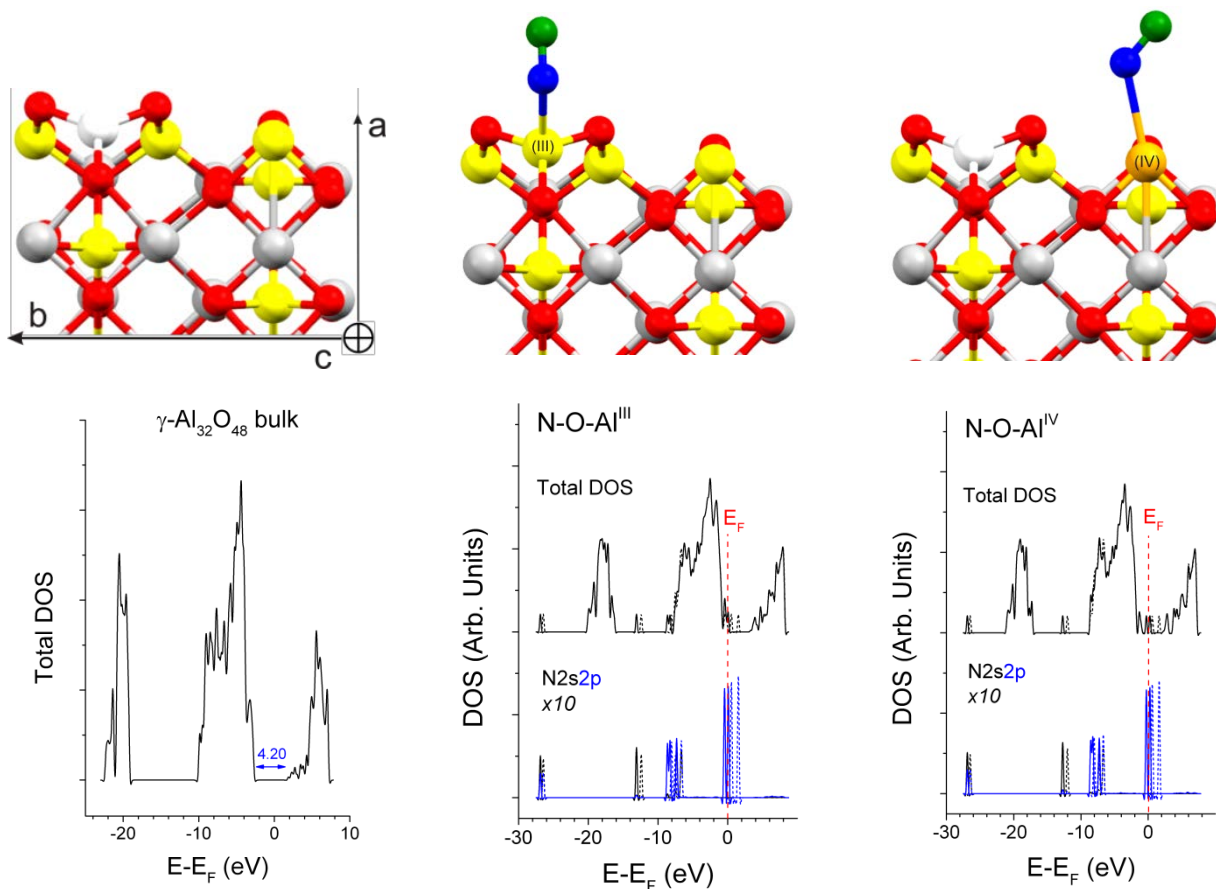

**FIG. S(b).** Views, total DOS and pDOS (solid lines for spin-up and dotted lines for spin-down) of (a) free  $\gamma\text{-Al}_2\text{O}_3(110)$ , (b)  $\text{NO}/\text{Al}^{\text{III}}$  and (c)  $\text{NO}/\text{Al}^{\text{IV}}$  states on  $\gamma\text{-Al}_2\text{O}_3(110)$ ; adsorption heats, bond lengths, bond angles and the primary coordination of the atom ( in parenthesis) are indicated. Color legends: white for  $\text{Al}^{\text{III}}$ , yellow for  $\text{Al}^{\text{IV}}$ , grey for  $\text{Al}^{\text{VI}}$ , green for N, red for O in oxide and blue for O in NO.

### (c) Catalytic reaction of H<sub>2</sub> + O<sub>2</sub> on noble metals (experimental data)

The reaction rate ( $w$ ) on Pt, Ir, Pd and Rh wires ( $P = 2 \cdot 10^{-5}$  Pa;  $T = 180-400$  K) is as follows:<sup>26</sup>

$$\text{Excess O}_2: w = k \cdot P_{\text{H}_2}^2 \cdot P_{\text{O}_2}^{-1}$$

$$\text{Excess H}_2: w = k \cdot P_{\text{H}_2}^0 \cdot P_{\text{O}_2}^1$$

The reaction rate on Pt single crystals ( $P = 10^{-6} - 10^{-4}$  Pa;  $T = 300 - 360$  K) is as follows:<sup>27</sup>

$$\text{Pt(111), excess O}_2: w = k \cdot P_{\text{H}_2}^{1.8} \cdot P_{\text{O}_2}^{-0.8}; \text{ excess H}_2: w = k \cdot P_{\text{H}_2}^0 \cdot P_{\text{O}_2}^1$$

$$\text{Pt(110), excess O}_2: w = k \cdot P_{\text{H}_2}^{1.9} \cdot P_{\text{O}_2}^{-0.9}; \text{ excess H}_2: w = k \cdot P_{\text{H}_2}^{-0.4} \cdot P_{\text{O}_2}^1$$

During the reaction, the surface is covered with either oxygen or hydrogen, depending on the H<sub>2</sub>/O<sub>2</sub> ratio in the reaction mixture.<sup>26, 27</sup>

With regard to the reaction of NO+H<sub>2</sub> on Pt/ $\gamma$ -Al<sub>2</sub>O<sub>3</sub>(110), this means that an excess O<sub>2</sub> in the reaction mixture prevents the formation of H/Pt, excluding the flow of H atoms from Pt to  $\gamma$ -Al<sub>2</sub>O<sub>3</sub>(110); and a highly stable NH<sub>2</sub>+H complex inhibiting the active center O<sup>II</sup>-Al<sup>III</sup>-O<sup>II</sup> is not formed, which ultimately increases the catalytic activity.

### (d) Absorption of NO and H<sub>2</sub> in bulk $\gamma$ -Al<sub>2</sub>O<sub>3</sub>

Table S(d). (i) Absorption of NO in bulk  $\gamma$ -Al<sub>32</sub>O<sub>48</sub>

| #  |    | X            | Y           | Z           | #         | X  | Y            | Z            |             |
|----|----|--------------|-------------|-------------|-----------|----|--------------|--------------|-------------|
| 1  | O  | -3.636733978 | 0.646469708 | 7.197118771 | 43        | O  | 4.712455593  | 6.201011548  | 7.139479633 |
| 2  | O  | -3.610119337 | 3.281834006 | 7.195634103 | 44        | Al | 6.095206270  | 2.009119694  | 7.003366421 |
| 3  | O  | -0.978378888 | 6.370367956 | 7.143371657 | 45        | O  | 2.108486703  | 6.370155884  | 7.065759562 |
| 4  | Al | 0.479365283  | 1.904857309 | 7.005754327 | 46        | Al | 3.352940424  | 1.991014537  | 6.991487120 |
| 5  | O  | -3.591851540 | 6.161655854 | 6.999405722 | 47        | Al | 3.341520863  | 4.776612515  | 6.928812813 |
| 6  | Al | -2.327436905 | 1.921018902 | 7.044866227 | 48        | Al | 3.396076551  | 7.675319730  | 6.932514854 |
| 7  | Al | -2.241909303 | 4.726564081 | 6.913741042 | 49        | O  | 4.648232557  | 0.690408790  | 6.832115741 |
| 8  | Al | -2.353060940 | 7.626614526 | 6.883550122 | 50        | O  | 4.673417842  | 3.301951218  | 6.833506467 |
| 9  | O  | -1.014501929 | 0.630126400 | 6.833067655 | 51        | Al | 6.102296664  | 6.170749673  | 5.953695666 |
| 10 | O  | -1.083979570 | 3.153430202 | 6.841455689 | 52        | O  | 6.053576914  | 1.974098344  | 5.107037405 |
| 11 | Al | 0.571522442  | 6.482436518 | 6.114616469 | 53        | O  | 3.454935508  | 4.813632369  | 5.103614073 |
| 12 | O  | 0.430288174  | 1.853799772 | 5.110444602 | 54        | O  | 3.428137114  | 7.614092965  | 5.088111722 |
| 13 | O  | -2.026386969 | 4.789421921 | 5.081494424 | 55        | O  | 3.385584970  | 2.008819883  | 5.004331088 |
| 14 | O  | -2.203504807 | 7.574521524 | 5.050943424 | 56        | O  | 6.081590703  | 4.754092273  | 4.897601910 |
| 15 | O  | -2.258750837 | 1.917691099 | 4.961927160 | 57        | O  | 6.043805333  | 7.594524491  | 4.907211411 |
| 16 | O  | 0.838794787  | 5.320397783 | 4.577617539 | 58        | Al | 4.704746939  | 0.522612238  | 4.878398069 |
| 17 | O  | 0.448602897  | 7.707937116 | 4.874712911 | 59        | Al | 4.715994664  | 3.461078019  | 4.897170814 |
| 18 | Al | -0.938719069 | 0.489954783 | 4.854586929 | 60        | Al | 3.385285953  | 6.211065048  | 3.982593676 |
| 19 | Al | -1.002865476 | 3.268277577 | 4.858929072 | 61        | Al | 7.445541087  | 1.952931589  | 3.938490261 |
| 20 | Al | -2.154814699 | 6.178199235 | 3.962012726 | 62        | Al | 6.215371908  | 4.711306664  | 3.065763435 |
| 21 | Al | 1.891799663  | 2.035519520 | 3.986157074 | 63        | Al | 6.206543990  | 7.625220685  | 3.079655542 |
| 22 | Al | 0.595854496  | 4.770837915 | 2.860654823 | 64        | O  | 4.880844487  | 0.559481440  | 3.062917272 |
| 23 | Al | 0.657308305  | 7.720782732 | 3.043423358 | 65        | O  | 4.885421919  | 3.390858865  | 3.067679908 |
| 24 | O  | -0.737888803 | 0.582498865 | 3.018673957 | 66        | O  | 7.529926089  | 6.158963800  | 2.952193585 |
| 25 | O  | -0.686291807 | 3.419127564 | 3.059189888 | 67        | O  | 7.476710201  | 0.547439645  | 2.872523255 |
| 26 | O  | 2.012111510  | 6.320094570 | 2.822536847 | 68        | O  | 7.511182932  | 3.375621627  | 2.872346358 |
| 27 | O  | 1.905822464  | 0.656372218 | 2.866181655 | 69        | O  | 4.859858681  | 6.175017290  | 2.866131143 |
| 28 | O  | 1.898251717  | 3.443221807 | 2.854244037 | 70        | Al | 4.834972973  | 1.974125414  | 2.011133146 |
| 29 | O  | -0.738218970 | 6.223142346 | 2.788677014 | 71        | O  | 6.292805547  | 4.860943819  | 1.127317920 |
| 30 | Al | -0.759459456 | 1.995003823 | 1.964909536 | 72        | O  | 6.281327884  | 7.474930527  | 1.130729891 |
| 31 | O  | 0.727931240  | 4.948997685 | 1.048255286 | 73        | Al | 7.584566709  | 0.521815040  | 1.062376822 |
| 32 | O  | 0.712757565  | 7.575249619 | 1.085968187 | 74        | Al | 7.612200081  | 3.418299385  | 1.043284832 |
| 33 | Al | 2.082559087  | 0.584924331 | 1.054759187 | 75        | Al | 7.592288284  | 6.167076129  | 0.952972965 |
| 34 | Al | 2.096427528  | 3.445373381 | 1.028327205 | 76        | O  | 8.902317380  | 1.963223659  | 0.954636442 |
| 35 | Al | 2.056056895  | 6.269751975 | 0.932658068 | 77        | Al | 4.824705403  | 6.208446777  | 0.976209811 |
| 36 | O  | 3.375066037  | 1.992378882 | 0.973101146 | 78        | O  | 6.245796530  | 1.971465069  | 0.842361598 |
| 37 | Al | -0.783500894 | 6.324719014 | 0.922973043 | 79        | O  | 8.928200744  | 4.872103017  | 0.741646738 |
| 38 | O  | 0.664851220  | 2.020274810 | 0.813977114 | 80        | O  | 8.860226319  | 7.516125573  | 0.783222053 |
| 39 | O  | 3.358124384  | 4.919684868 | 0.763953755 | 81        | O  | 0.535157059  | 4.697703587  | 6.557513103 |
| 40 | O  | 3.405350426  | 7.573247650 | 0.789119686 | 82        | N  | 0.607634496  | 4.227960153  | 5.360979972 |
| 41 | O  | 2.017870907  | 0.694275169 | 7.206533367 | <b>2a</b> |    | 11.166678380 | -0.006741176 | 0.001911287 |
| 42 | O  | 2.134670272  | 3.267257570 | 7.247660620 | <b>b</b>  |    | 0.005073810  | 8.408285652  | 0.000007246 |
|    |    |              |             |             | <b>c</b>  |    | -0.075123555 | 0.000036362  | 8.076694983 |

**Table S(d). (ii) Absorption of H<sub>2</sub> in bulk  $\gamma$ -Al<sub>32</sub>O<sub>48</sub>**

| #  | X  | Y            | Z           | #           | X         | Y  | Z            |              |             |
|----|----|--------------|-------------|-------------|-----------|----|--------------|--------------|-------------|
| 1  | O  | -3.577602597 | 0.689411392 | 7.181371935 | 43        | O  | 4.683861130  | 6.213852615  | 7.119707492 |
| 2  | O  | -3.574635681 | 3.310132082 | 7.184611107 | 44        | Al | 6.119467880  | 1.981299641  | 6.995443230 |
| 3  | O  | -0.922961673 | 6.213734015 | 7.105783044 | 45        | O  | 1.993264466  | 6.203645572  | 6.982330688 |
| 4  | Al | 0.505509091  | 1.955154008 | 6.985549339 | 46        | Al | 3.347297570  | 1.997443456  | 6.989145122 |
| 5  | O  | -3.599164317 | 6.209320027 | 7.000875247 | 47        | Al | 3.344996770  | 4.782234092  | 6.912299410 |
| 6  | Al | -2.256291105 | 2.000464943 | 6.986508231 | 48        | Al | 3.302975720  | 7.651914381  | 6.890122552 |
| 7  | Al | -2.295821294 | 4.764214421 | 6.889337029 | 49        | O  | 4.648774211  | 0.683972865  | 6.834810133 |
| 8  | Al | -2.295120440 | 7.645780792 | 6.886777512 | 50        | O  | 4.650304969  | 3.312403631  | 6.823464223 |
| 9  | O  | -0.965673660 | 0.676826840 | 6.827950082 | 51        | Al | 6.099784572  | 6.194628705  | 5.940834351 |
| 10 | O  | -0.951380740 | 3.309065359 | 6.808984326 | 52        | O  | 6.099574607  | 1.993587620  | 5.105390948 |
| 11 | Al | 0.496624777  | 6.237200210 | 5.947879887 | 53        | O  | 3.539080644  | 4.870358646  | 5.083292468 |
| 12 | O  | 0.440100788  | 1.945488714 | 5.092471588 | 54        | O  | 3.423697606  | 7.627017626  | 5.071183780 |
| 13 | O  | -2.215884995 | 4.786257222 | 5.067132979 | 55        | O  | 3.465013290  | 1.961984889  | 4.978456270 |
| 14 | O  | -2.163850884 | 7.601021483 | 5.064716431 | 56        | O  | 6.095222011  | 4.778864483  | 4.879987242 |
| 15 | O  | -2.194328644 | 1.994185684 | 4.990478564 | 57        | O  | 6.049853220  | 7.607903452  | 4.880158207 |
| 16 | O  | 0.338948432  | 4.871385887 | 4.844619726 | 58        | Al | 4.724044866  | 0.529364946  | 4.874809321 |
| 17 | O  | 0.463531903  | 7.635325926 | 4.876395548 | 59        | Al | 4.773622362  | 3.458217384  | 4.886530841 |
| 18 | Al | -0.888147836 | 0.529094540 | 4.862799763 | 60        | Al | 3.426416117  | 6.245755033  | 3.958052849 |
| 19 | Al | -0.920454769 | 3.468391900 | 4.864061318 | 61        | Al | 7.515999633  | 1.996184308  | 3.946230696 |
| 20 | Al | -2.168433411 | 6.193714278 | 3.971414827 | 62        | Al | 6.227139655  | 4.735891462  | 3.045883167 |
| 21 | Al | 1.938817148  | 2.039714058 | 3.976236779 | 63        | Al | 6.230721702  | 7.669663846  | 3.048897882 |
| 22 | Al | 0.592339321  | 4.750027585 | 3.015785544 | 64        | O  | 4.896903971  | 0.581382255  | 3.039929797 |
| 23 | Al | 0.637252523  | 7.689923025 | 3.048637743 | 65        | O  | 4.893039604  | 3.411352701  | 3.050810242 |
| 24 | O  | -0.718107818 | 0.580064943 | 3.028950107 | 66        | O  | 7.529766676  | 6.201220797  | 2.929196757 |
| 25 | O  | -0.716879090 | 3.408133763 | 3.035693262 | 67        | O  | 7.515107902  | 0.589337437  | 2.857484480 |
| 26 | O  | 1.940625839  | 6.209730223 | 2.938435065 | 68        | O  | 7.512499883  | 3.399359643  | 2.850633153 |
| 27 | O  | 1.917317656  | 0.622789701 | 2.866468960 | 69        | O  | 4.857936105  | 6.210960208  | 2.825205819 |
| 28 | O  | 1.896157655  | 3.412826972 | 2.802802880 | 70        | Al | 4.837933711  | 1.998315491  | 1.983558184 |
| 29 | O  | -0.747213235 | 6.214655047 | 2.806144706 | 71        | O  | 6.290787355  | 4.891983856  | 1.105714586 |
| 30 | Al | -0.748687355 | 1.993313158 | 1.971485771 | 72        | O  | 6.298018234  | 7.515997253  | 1.105381577 |
| 31 | O  | 0.697065926  | 4.913804602 | 1.084499410 | 73        | Al | 7.633252941  | 0.555367822  | 1.036849478 |
| 32 | O  | 0.717263559  | 7.529945407 | 1.103297340 | 74        | Al | 7.632170339  | 3.436812422  | 1.031701001 |
| 33 | Al | 2.053025023  | 0.571624461 | 1.044593646 | 75        | Al | 7.596424614  | 6.200045239  | 0.938195065 |
| 34 | Al | 2.041489890  | 3.447196696 | 1.009943806 | 76        | O  | 8.939978393  | 1.994126704  | 0.922844162 |
| 35 | Al | 2.011751592  | 6.212623422 | 0.936394701 | 77        | Al | 4.825275023  | 6.219610982  | 0.944992691 |
| 36 | O  | 3.365013703  | 1.999167091 | 0.926050307 | 78        | O  | 6.262577785  | 1.996381398  | 0.821562788 |
| 37 | Al | -0.772105030 | 6.225123322 | 0.928183034 | 79        | O  | 8.913816567  | 4.888977193  | 0.738544719 |
| 38 | O  | 0.667649945  | 1.993568172 | 0.801481289 | 80        | O  | 8.914351041  | 7.512985436  | 0.741068445 |
| 39 | O  | 3.338552856  | 4.906986263 | 0.745396642 | 81        | H  | 2.236804645  | 3.725875766  | 4.819364847 |
| 40 | O  | 3.334001182  | 7.521088721 | 0.743147208 | 82        | H  | 1.678335727  | 3.432876731  | 5.207996484 |
| 41 | O  | 2.015340918  | 0.693462125 | 7.178282534 | <b>2a</b> |    | 11.166678380 | -0.006741176 | 0.001911287 |
| 42 | O  | 2.028704540  | 3.315142409 | 7.197625889 | <b>b</b>  |    | 0.005073810  | 8.408285652  | 0.000007246 |
|    |    |              |             |             | <b>c</b>  |    | -0.075123555 | 0.000036362  | 8.076694983 |

## (e) Atomic coordinates of optimized configurations (Å)

Table S1. Bulk  $\gamma$ -Al<sub>32</sub>O<sub>48</sub> in Fig. 1(a)

| #  |    | X            | Y           | Z           | #  |           | X            | Y            | Z           |
|----|----|--------------|-------------|-------------|----|-----------|--------------|--------------|-------------|
| 1  | O  | 2.016830371  | 3.314553908 | 7.178867572 | 41 | Al        | 7.520016647  | 2.000776461  | 3.950355463 |
| 2  | O  | 2.015243939  | 0.693653342 | 7.17886283  | 42 | Al        | 1.936677317  | 2.004146881  | 3.949399904 |
| 3  | O  | -3.566508766 | 3.317924497 | 7.177911758 | 43 | Al        | 6.219588405  | 7.673789586  | 3.046287171 |
| 4  | O  | -3.568095241 | 0.697023856 | 7.177907005 | 44 | Al        | 6.217819081  | 4.737625953  | 3.046284835 |
| 5  | O  | 4.670691003  | 6.206644912 | 7.106744807 | 45 | Al        | 0.636249173  | 7.677160189  | 3.045331572 |
| 6  | O  | -0.912648104 | 6.210015499 | 7.105789377 | 46 | Al        | 0.634480024  | 4.740996629  | 3.04532947  |
| 7  | O  | 1.989214736  | 6.208262119 | 6.993652693 | 47 | O         | 4.886730392  | 3.414189993  | 3.041084575 |
| 8  | O  | -3.594124554 | 6.21163267  | 6.992697082 | 48 | O         | 4.885020481  | 0.590542955  | 3.04108176  |
| 9  | Al | 3.337555345  | 2.003304673 | 6.983251461 | 49 | O         | -0.696608766 | 3.417560712  | 3.040129263 |
| 10 | Al | -2.245783822 | 2.006675168 | 6.982295753 | 50 | O         | -0.698318739 | 0.593913697  | 3.040126199 |
| 11 | Al | 6.115813879  | 2.001632105 | 6.98228373  | 51 | O         | 7.525734529  | 6.204919394  | 2.932338219 |
| 12 | Al | 0.532474674  | 2.00500273  | 6.981328309 | 52 | O         | 1.942395332  | 6.20829005   | 2.931382576 |
| 13 | Al | 3.300849784  | 7.647859583 | 6.887202067 | 53 | O         | 7.510291554  | 3.406029636  | 2.854078162 |
| 14 | Al | 3.299116676  | 4.767087186 | 6.887201391 | 54 | O         | 7.508585657  | 0.595544599  | 2.854069577 |
| 15 | Al | -2.282489585 | 7.65123015  | 6.886246398 | 55 | O         | 1.926952387  | 3.409400208  | 2.853122747 |
| 16 | Al | -2.284222464 | 4.770457859 | 6.886245815 | 56 | O         | 1.925246403  | 0.598915172  | 2.853113875 |
| 17 | O  | 4.640951348  | 3.313915497 | 6.816929428 | 57 | O         | 4.848408924  | 6.206535415  | 2.824037535 |
| 18 | O  | 4.639365543  | 0.691119148 | 6.816927194 | 58 | O         | -0.734930193 | 6.209906103  | 2.823082095 |
| 19 | O  | -0.942387828 | 3.317285995 | 6.815974134 | 59 | Al        | 4.83922962   | 2.002395867  | 1.976243529 |
| 20 | O  | -0.943973644 | 0.69448962  | 6.815971477 | 60 | Al        | -0.744109571 | 2.005766723  | 1.975288048 |
| 21 | Al | 6.094510973  | 6.205783121 | 5.943027732 | 61 | O         | 6.294373689  | 7.517065739  | 1.102341903 |
| 22 | Al | 0.511171782  | 6.209153827 | 5.94207227  | 62 | O         | 6.292797252  | 4.894270504  | 1.102341461 |
| 23 | O  | 6.085329184  | 2.001645199 | 5.095230742 | 63 | O         | 0.711034402  | 7.520436313  | 1.101386395 |
| 24 | O  | 0.501990002  | 2.005015686 | 5.094275305 | 64 | O         | 0.709458111  | 4.897641097  | 1.101385979 |
| 25 | O  | 3.425145115  | 7.612634759 | 5.065198989 | 65 | Al        | 7.634630784  | 3.44110567   | 1.032074909 |
| 26 | O  | 3.423447636  | 4.802147832 | 5.065198413 | 66 | Al        | 7.632881716  | 0.560332141  | 1.032066547 |
| 27 | O  | -2.158194027 | 7.616005264 | 5.064243412 | 67 | Al        | 2.051291633  | 3.444476257  | 1.031119476 |
| 28 | O  | -2.159891527 | 4.805518437 | 5.064242838 | 68 | Al        | 2.049542427  | 0.563702697  | 1.031110931 |
| 29 | O  | 3.408005058  | 2.003255991 | 4.986934226 | 69 | Al        | 4.817929631  | 6.206562353  | 0.936984723 |
| 30 | O  | -2.175334125 | 2.006626676 | 4.985978745 | 70 | Al        | -0.765409542 | 6.209932975  | 0.936029298 |
| 31 | O  | 6.048712074  | 7.617633751 | 4.878186122 | 71 | Al        | 7.596190171  | 6.204885     | 0.936027981 |
| 32 | O  | 6.047003856  | 4.793990732 | 4.878183534 | 72 | Al        | 2.012850969  | 6.208255577  | 0.935072277 |
| 33 | O  | 0.465372999  | 7.621004391 | 4.877230523 | 73 | O         | 8.944525135  | 1.999925478  | 0.925620884 |
| 34 | O  | 0.463664681  | 4.797361334 | 4.877228188 | 74 | O         | 3.361185928  | 2.003296083  | 0.92466519  |
| 35 | Al | 4.715917241  | 3.470550692 | 4.872984901 | 75 | O         | 6.263048949  | 2.001545934  | 0.81252482  |
| 36 | Al | 4.714146233  | 0.534388188 | 4.872983598 | 76 | O         | 0.679709704  | 2.004916613  | 0.811569349 |
| 37 | Al | -0.867421871 | 3.47392128  | 4.872029577 | 77 | O         | 8.918494747  | 7.514540112  | 0.740407656 |
| 38 | Al | -0.869192893 | 0.537758749 | 4.872028001 | 78 | O         | 8.91691919   | 4.893638317  | 0.74040643  |
| 39 | Al | 3.413722789  | 6.207397425 | 3.968917713 | 79 | O         | 3.335155559  | 7.517910665  | 0.739451942 |
| 40 | Al | -2.169616411 | 6.210768031 | 3.967962115 | 80 | O         | 3.333580009  | 4.897008882  | 0.739450764 |
|    |    |              |             |             |    | <b>2a</b> | 11.166678377 | -0.006741176 | 0.001911287 |
|    |    |              |             |             |    | <b>b</b>  | 0.005073810  | 8.408285652  | 7.24600E-06 |
|    |    |              |             |             |    | <b>c</b>  | -0.075123555 | 3.63620E-05  | 8.076694983 |



**Table S2.**  $\gamma$ -Al<sub>32</sub>O<sub>48</sub>(110)-(1×1) unit cell in **Fig. 2(a)**

The atoms are listed in descending order Z; the lower half is a mirror image of the upper one; the charges and fillings of the states of the atoms are indicated.

| #  | Charge | State filling                                           | X           | Y           | Z           | #         | X            | Y           | Z           |             |
|----|--------|---------------------------------------------------------|-------------|-------------|-------------|-----------|--------------|-------------|-------------|-------------|
| 1  | -0.84  | O <sup>II</sup> 2s <sup>1.67</sup> 2p <sup>5.17</sup>   | 3.12621313  | 11.80336365 | 16.46196191 | 41        | O            | 2.954182723 | 11.81867747 | 10.51250426 |
| 2  | -0.84  | O <sup>II</sup> 2s <sup>1.67</sup> 2p <sup>5.17</sup>   | 3.126226487 | 9.023887706 | 16.46195507 | 42        | O            | 2.954199679 | 9.008571009 | 10.51249754 |
| 3  | -0.84  | O <sup>II</sup> 2s <sup>1.66</sup> 2p <sup>5.18</sup>   | 2.562966536 | 6.209476899 | 16.01031068 | 43        | Al           | 1.882530913 | 10.41361774 | 10.42987002 |
| 4  | 1.42   | Al <sup>III</sup> 3s <sup>0.52</sup> 3p <sup>1.05</sup> | 2.26632668  | 10.41362231 | 15.95090033 | 44        | O            | 2.730334019 | 6.209479587 | 10.42915086 |
| 5  | -0.83  | O <sup>III</sup> 2s <sup>1.65</sup> 2p <sup>5.18</sup>  | 6.488829769 | 9.013058014 | 15.877472   | 45        | O            | 6.738233459 | 9.087481946 | 10.37808239 |
| 6  | -0.83  | O <sup>III</sup> 2s <sup>1.65</sup> 2p <sup>5.18</sup>  | 6.488818264 | 11.81423271 | 15.87744843 | 46        | O            | 6.738210262 | 11.73980167 | 10.37807734 |
| 7  | -0.82  | O <sup>III</sup> 2s <sup>1.66</sup> 2p <sup>5.17</sup>  | 7.187841946 | 6.209504967 | 15.84615398 | 47        | Al           | 4.792123074 | 11.86725484 | 10.35097019 |
| 8  | 1.39   | Al <sup>IV</sup> 3s <sup>0.49</sup> 3p <sup>1.12</sup>  | 4.671210488 | 11.92038167 | 15.69307044 | 48        | Al           | 4.79213822  | 8.960013644 | 10.35096937 |
| 9  | 1.39   | Al <sup>IV</sup> 3s <sup>0.49</sup> 3p <sup>1.12</sup>  | 4.671220181 | 8.906890597 | 15.69306385 | 49        | O            | 6.990294469 | 6.209497722 | 10.26645974 |
| 10 | 1.41   | Al <sup>VI</sup> 3s <sup>0.51</sup> 3p <sup>1.08</sup>  | 0.903451658 | 6.209470143 | 15.65507609 | 50        | Al           | 0.862037955 | 6.209464884 | 10.26064129 |
| 11 | 1.29   | Al <sup>VI</sup> 3s <sup>0.50</sup> 3p <sup>1.21</sup>  | 7.031533076 | 10.41364576 | 14.84820299 | 51        | Al           | 6.973319174 | 10.41364306 | 9.127182787 |
| 12 | -0.78  | O <sup>IV</sup> 2s <sup>1.65</sup> 2p <sup>5.13</sup>   | 0.891122813 | 10.41362167 | 14.76332609 | 52        | Al           | 3.9402884   | 6.209485036 | 9.105290195 |
| 13 | 1.37   | Al <sup>IV</sup> 3s <sup>0.49</sup> 3p <sup>1.13</sup>  | 3.680860126 | 6.209485737 | 14.68403784 | 53        | O            | 4.932952275 | 10.41363316 | 9.086996142 |
| 14 | -0.84  | O <sup>III</sup> 2s <sup>1.62</sup> 2p <sup>5.22</sup>  | 4.887236501 | 7.511494942 | 14.66082839 | 54        | O            | 4.998234335 | 7.631005724 | 9.030072255 |
| 15 | -0.84  | O <sup>III</sup> 2s <sup>1.62</sup> 2p <sup>5.22</sup>  | 4.887249488 | 4.907486706 | 14.66082692 | 55        | O            | 4.99824922  | 4.787974466 | 9.030070862 |
| 16 | 1.69   | Al <sup>VI</sup> 3s <sup>0.49</sup> 3p <sup>1.22</sup>  | 6.753558141 | 7.603045496 | 14.64294422 | 56        | O            | 0.840113181 | 10.41361037 | 8.970680568 |
| 17 | 1.69   | Al <sup>VI</sup> 3s <sup>0.49</sup> 3p <sup>1.22</sup>  | 6.753568696 | 4.815961658 | 14.64294034 | 57        | Al           | 6.823626558 | 4.750994291 | 8.969014702 |
| 18 | -0.82  | O <sup>IV</sup> 2s <sup>1.64</sup> 2p <sup>5.19</sup>   | 4.658915965 | 10.41363706 | 14.61313755 | 58        | Al           | 6.823608804 | 7.668003439 | 8.969010749 |
| 19 | -0.80  | O <sup>IV</sup> 2s <sup>1.63</sup> 2p <sup>5.17</sup>   | 0.653328813 | 7.546851888 | 14.38947367 | 59        | O            | 0.624588949 | 7.473243098 | 8.811931342 |
| 20 | -0.80  | O <sup>IV</sup> 2s <sup>1.63</sup> 2p <sup>5.17</sup>   | 0.653334566 | 4.872082966 | 14.38946572 | 60        | O            | 0.624620721 | 4.945690377 | 8.811917655 |
| 21 | -0.79  | O <sup>IV</sup> 2s <sup>1.65</sup> 2p <sup>5.14</sup>   | 7.090609944 | 9.149865117 | 13.3563149  | 61        | O            | 7.061903279 | 11.75103323 | 7.778706126 |
| 22 | -0.79  | O <sup>IV</sup> 2s <sup>1.65</sup> 2p <sup>5.14</sup>   | 7.090620619 | 11.67742446 | 13.35625127 | 62        | O            | 7.061904517 | 9.076256393 | 7.778691724 |
| 23 | 1.27   | Al <sup>VI</sup> 3s <sup>0.49</sup> 3p <sup>1.24</sup>  | 0.891625692 | 8.955105715 | 13.19916935 | 63        | O            | 3.056288727 | 6.209480396 | 7.555067663 |
| 24 | 1.27   | Al <sup>VI</sup> 3s <sup>0.49</sup> 3p <sup>1.24</sup>  | 0.891610675 | 11.87212345 | 13.19916556 | 64        | Al           | 0.961660076 | 11.80714999 | 7.525240262 |
| 25 | -0.78  | O <sup>IV</sup> 2s <sup>1.63</sup> 2p <sup>5.15</sup>   | 6.875136651 | 6.209500401 | 13.19747857 | 65        | Al           | 0.96167366  | 9.020069544 | 7.525234382 |
| 26 | -0.82  | O <sup>III</sup> 2s <sup>1.63</sup> 2p <sup>5.19</sup>  | 2.717002653 | 8.992110426 | 13.13810389 | 66        | O            | 2.827980675 | 11.7156281  | 7.507368575 |
| 27 | -0.82  | O <sup>III</sup> 2s <sup>1.63</sup> 2p <sup>5.19</sup>  | 2.716983923 | 11.83514786 | 13.13810378 | 67        | O            | 2.827995736 | 9.111617238 | 7.507358691 |
| 28 | -0.79  | O <sup>IV</sup> 2s <sup>1.63</sup> 2p <sup>5.16</sup>   | 2.782285994 | 6.20947877  | 13.08117687 | 68        | Al           | 4.034373339 | 10.41362861 | 7.484141773 |
| 29 | 1.35   | Al <sup>IV</sup> 3s <sup>0.50</sup> 3p <sup>1.15</sup>  | 3.774946867 | 10.41363375 | 13.06289824 | 69        | O            | 6.824123947 | 6.20949736  | 7.404861763 |
| 30 | 1.24   | Al <sup>VI</sup> 3s <sup>0.48</sup> 3p <sup>1.28</sup>  | 0.741922737 | 6.209468685 | 13.04100102 | 70        | Al           | 0.683712368 | 6.209465021 | 7.319994373 |
| 31 | 1.27   | Al <sup>VI</sup> 3s <sup>0.50</sup> 3p <sup>1.23</sup>  | 6.85319406  | 10.41364233 | 11.90754445 | 71        | Al           | 6.811773245 | 10.4136437  | 6.513104196 |
| 32 | -0.77  | O <sup>IV</sup> 2s <sup>1.63</sup> 2p <sup>5.14</sup>   | 0.72493575  | 10.41360857 | 11.90172066 | 72        | Al           | 3.044028456 | 4.702737698 | 6.475126328 |
| 33 | 1.26   | Al <sup>VI</sup> 3s <sup>0.48</sup> 3p <sup>1.26</sup>  | 2.923114367 | 4.755861801 | 11.8172076  | 73        | Al           | 3.044010771 | 7.716218517 | 6.475123376 |
| 34 | 1.26   | Al <sup>VI</sup> 3s <sup>0.48</sup> 3p <sup>1.26</sup>  | 2.923098055 | 7.663103445 | 11.81720752 | 74        | O            | 0.527380793 | 10.41361096 | 6.322009349 |
| 35 | -0.78  | O <sup>IV</sup> 2s <sup>1.64</sup> 2p <sup>5.14</sup>   | 0.977014706 | 7.535624978 | 11.79009955 | 75        | O            | 1.226392068 | 7.610053848 | 6.290727903 |
| 36 | -0.78  | O <sup>IV</sup> 2s <sup>1.64</sup> 2p <sup>5.14</sup>   | 0.97702176  | 4.883322852 | 11.79009405 | 76        | O            | 1.226418645 | 4.808883509 | 6.290724775 |
| 37 | -0.78  | O <sup>IV</sup> 2s <sup>1.62</sup> 2p <sup>5.16</sup>   | 4.984900137 | 10.41363422 | 11.73901942 | 77        | Al           | 5.448917668 | 6.209494302 | 6.217295276 |
| 38 | 1.37   | Al <sup>IV</sup> 3s <sup>0.51</sup> 3p <sup>1.12</sup>  | 5.832711059 | 6.209496153 | 11.7383139  | 78        | O            | 5.152254507 | 10.41363912 | 6.157857554 |
| 39 | -0.82  | O <sup>III</sup> 2s <sup>1.62</sup> 2p <sup>5.20</sup>  | 4.76105501  | 4.804439206 | 11.65567184 | 79        | O            | 4.589013188 | 7.599227782 | 5.706242391 |
| 40 | -0.82  | O <sup>III</sup> 2s <sup>1.62</sup> 2p <sup>5.20</sup>  | 4.761039989 | 7.614541908 | 11.65567117 | 80        | O            | 4.58902529  | 4.819753304 | 5.706238185 |
|    |        |                                                         |             |             |             | <b>T1</b> | 8.077044348  | 4.25645E-05 | 0           |             |
|    |        |                                                         |             |             |             | <b>T2</b> | -4.64021E-05 | 8.408287183 | 0           |             |

**Table S3(a).** The surface oxynitride  $\gamma\text{-Al}_{32}\text{O}_{47}\text{N}^{\text{IV}}(110)$  in Fig. 3(a)

| #  |    | X           | Y           | Z           | #  |    | X           | Y           | Z           |
|----|----|-------------|-------------|-------------|----|----|-------------|-------------|-------------|
| 1  | O  | 3.200853628 | 9.046178659 | 16.64417502 | 41 | O  | 2.952090713 | 9.012971093 | 10.47724542 |
| 2  | O  | 3.200838285 | 11.78107613 | 16.64416929 | 42 | O  | 2.952072922 | 11.81428454 | 10.47724169 |
| 3  | O  | 2.559229209 | 6.209480501 | 16.00092772 | 43 | Al | 1.868840569 | 10.41361904 | 10.44658005 |
| 4  | Al | 2.334736644 | 10.41362189 | 15.96715948 | 44 | O  | 2.731579387 | 6.209479823 | 10.38988618 |
| 5  | O  | 6.48439857  | 9.015952267 | 15.885696   | 45 | O  | 6.73399256  | 9.082087176 | 10.37199527 |
| 6  | O  | 6.484383054 | 11.8113374  | 15.88569355 | 46 | O  | 6.733975235 | 11.74520411 | 10.37198746 |
| 7  | O  | 7.163964513 | 6.209504525 | 15.82061129 | 47 | Al | 4.788767321 | 8.962451672 | 10.3563798  |
| 8  | Al | 4.694555523 | 8.90251589  | 15.73877239 | 48 | Al | 4.788750673 | 11.86481727 | 10.35637378 |
| 9  | Al | 4.694541027 | 11.92475644 | 15.73876838 | 49 | Al | 0.860888225 | 6.209471559 | 10.26562089 |
| 10 | Al | 0.872191089 | 6.209471054 | 15.63009437 | 50 | O  | 6.980335691 | 6.209501603 | 10.24778564 |
| 11 | Al | 7.172126325 | 10.41364614 | 14.94058042 | 51 | Al | 6.973077153 | 10.41364472 | 9.138423994 |
| 12 | N  | 0.970586215 | 10.41361383 | 14.75936462 | 52 | Al | 3.957911609 | 6.209481919 | 9.095128638 |
| 13 | O  | 4.45929599  | 10.41363409 | 14.71464498 | 53 | O  | 4.937489003 | 10.41363015 | 9.083448    |
| 14 | O  | 4.866194889 | 7.523896648 | 14.67549806 | 54 | O  | 5.000012225 | 7.640974866 | 9.010216839 |
| 15 | O  | 4.866209198 | 4.895088644 | 14.67549705 | 55 | O  | 5.000030154 | 4.777997818 | 9.010196227 |
| 16 | Al | 3.683785929 | 6.209487734 | 14.63713603 | 56 | Al | 6.820677497 | 7.682379925 | 8.989119998 |
| 17 | Al | 6.744543442 | 7.618881599 | 14.60834603 | 57 | Al | 6.820694365 | 4.736623707 | 8.98911004  |
| 18 | Al | 6.744558774 | 4.80012419  | 14.6083438  | 58 | O  | 0.83758325  | 10.41361302 | 8.964115917 |
| 19 | O  | 0.663274028 | 4.890219324 | 14.37667096 | 59 | O  | 0.612235629 | 7.470354537 | 8.786634607 |
| 20 | O  | 0.663253282 | 7.528719409 | 14.37666868 | 60 | O  | 0.612249911 | 4.948586873 | 8.786626376 |
| 21 | O  | 7.076920661 | 9.138719195 | 13.37450792 | 61 | O  | 7.051236534 | 11.74887204 | 7.770555891 |
| 22 | O  | 7.076911514 | 11.68857192 | 13.37450734 | 62 | O  | 7.051244374 | 9.078412971 | 7.770554617 |
| 23 | Al | 0.931765685 | 11.80460177 | 13.30659282 | 63 | Al | 0.958166842 | 9.016119752 | 7.532737997 |
| 24 | Al | 0.93177471  | 9.022620265 | 13.30658148 | 64 | Al | 0.958149566 | 11.81110374 | 7.532733321 |
| 25 | O  | 6.858353561 | 6.209500227 | 13.1866037  | 65 | Al | 4.022362941 | 10.41362823 | 7.507674344 |
| 26 | O  | 2.745535074 | 8.965378959 | 13.09453739 | 66 | O  | 3.144945982 | 6.209478268 | 7.502980057 |
| 27 | O  | 2.745523173 | 11.86186947 | 13.09453541 | 67 | O  | 2.828104673 | 9.109080897 | 7.486956673 |
| 28 | Al | 3.760834409 | 10.41362738 | 13.0750333  | 68 | O  | 2.828087121 | 11.71815582 | 7.486952711 |
| 29 | O  | 2.782414078 | 6.209482431 | 13.05826811 | 69 | O  | 6.803681047 | 6.209497851 | 7.364794538 |
| 30 | Al | 0.7380126   | 6.209472281 | 13.00508676 | 70 | Al | 0.625750755 | 6.209466153 | 7.29449719  |
| 31 | Al | 6.863336517 | 10.41364468 | 11.95602756 | 71 | Al | 6.821535825 | 10.41364063 | 6.521733209 |
| 32 | O  | 0.716259142 | 10.41361014 | 11.89952251 | 72 | Al | 3.03093257  | 7.717567486 | 6.453113032 |
| 33 | Al | 2.898943955 | 7.665997374 | 11.78232039 | 73 | Al | 3.030945815 | 4.70138934  | 6.453112424 |
| 34 | Al | 2.898959488 | 4.752969635 | 11.78231852 | 74 | O  | 0.530478042 | 10.41360995 | 6.319765323 |
| 35 | O  | 4.989222612 | 10.413635   | 11.75485052 | 75 | O  | 1.22286565  | 7.602741356 | 6.284056783 |
| 36 | O  | 0.974211181 | 7.523791404 | 11.7535089  | 76 | O  | 1.222880865 | 4.816198471 | 6.284049989 |
| 37 | O  | 0.974227962 | 4.895165317 | 11.75349784 | 77 | Al | 5.413574521 | 6.209484964 | 6.227771975 |
| 38 | Al | 5.824659306 | 6.209498442 | 11.72277314 | 78 | O  | 5.143327529 | 10.41363829 | 6.152195005 |
| 39 | O  | 4.750406334 | 7.606965545 | 11.63263298 | 79 | O  | 4.572806685 | 7.600316836 | 5.645910062 |
| 40 | O  | 4.75042162  | 4.812020778 | 11.63261967 | 80 | O  | 4.572816694 | 4.818641768 | 5.64590874  |

**Table S3(b).** The surface oxynitride  $\gamma\text{-Al}_{32}\text{O}_{47}\text{N}^{\text{II}}(110)$  in **Fig. 3(b)**

| #  | X  | Y           | Z           | #           | X  | Y  | Z           |             |             |
|----|----|-------------|-------------|-------------|----|----|-------------|-------------|-------------|
| 1  | N  | 3.140365039 | 9.01405522  | 16.67859437 | 41 | O  | 2.953468701 | 9.009755133 | 10.51451188 |
| 2  | O  | 3.122331165 | 11.7304856  | 16.43843921 | 42 | O  | 2.953482783 | 11.82156629 | 10.5117927  |
| 3  | O  | 2.566648327 | 6.289632842 | 16.01108609 | 43 | O  | 2.730592716 | 6.209379298 | 10.43154295 |
| 4  | Al | 2.183986327 | 10.36526682 | 15.95450912 | 44 | Al | 1.883421007 | 10.41651904 | 10.42456994 |
| 5  | O  | 6.489022236 | 11.81720569 | 15.87375177 | 45 | O  | 6.737344187 | 11.739708   | 10.37394148 |
| 6  | O  | 6.528081602 | 9.007868418 | 15.87041747 | 46 | O  | 6.738002938 | 9.088724193 | 10.37194282 |
| 7  | O  | 7.185955325 | 6.215965482 | 15.84236057 | 47 | Al | 4.792286435 | 8.961500089 | 10.3493534  |
| 8  | Al | 4.709317982 | 8.902390074 | 15.73325907 | 48 | Al | 4.790500895 | 11.86738183 | 10.34857747 |
| 9  | Al | 4.671952078 | 11.89906523 | 15.67851811 | 49 | O  | 6.991604577 | 6.209093433 | 10.26637686 |
| 10 | Al | 0.897607862 | 6.229334487 | 15.65381886 | 50 | Al | 0.862789489 | 6.208466154 | 10.25690735 |
| 11 | Al | 6.990581946 | 10.41593627 | 14.8145225  | 51 | Al | 6.971157606 | 10.41408018 | 9.120258169 |
| 12 | O  | 0.861546486 | 10.4200637  | 14.72659271 | 52 | Al | 3.937905942 | 6.209924649 | 9.10356915  |
| 13 | O  | 4.874831507 | 4.911237836 | 14.67761438 | 53 | O  | 4.930916722 | 10.41442407 | 9.084312766 |
| 14 | Al | 3.690231256 | 6.22966936  | 14.67712315 | 54 | O  | 4.997376348 | 4.789399301 | 9.031027465 |
| 15 | O  | 4.894029488 | 7.526272061 | 14.6586903  | 55 | O  | 4.997299796 | 7.630655856 | 9.03090702  |
| 16 | Al | 6.751712482 | 4.820364344 | 14.64804476 | 56 | O  | 0.839067597 | 10.41423718 | 8.9672506   |
| 17 | Al | 6.760399141 | 7.609312071 | 14.62915194 | 57 | Al | 6.822709285 | 7.669057894 | 8.965497466 |
| 18 | O  | 4.726276123 | 10.39826509 | 14.59772033 | 58 | Al | 6.822150715 | 4.752761892 | 8.962781429 |
| 19 | O  | 0.667438587 | 4.877048971 | 14.40180892 | 59 | O  | 0.623497467 | 4.945466987 | 8.811722639 |
| 20 | O  | 0.651698381 | 7.554250679 | 14.38086031 | 60 | O  | 0.623419206 | 7.473130118 | 8.810790155 |
| 21 | O  | 7.086807278 | 11.69161585 | 13.34536832 | 61 | O  | 7.061067176 | 11.75173033 | 7.77486562  |
| 22 | O  | 7.082977817 | 9.148557699 | 13.33158119 | 62 | O  | 7.061536994 | 9.075944589 | 7.773972889 |
| 23 | Al | 0.895655343 | 11.8662081  | 13.20978226 | 63 | O  | 3.0514634   | 6.209709735 | 7.556046779 |
| 24 | O  | 6.875749938 | 6.205796613 | 13.19861851 | 64 | Al | 0.960469012 | 11.80622398 | 7.521298016 |
| 25 | Al | 0.883745189 | 8.958889018 | 13.17956333 | 65 | Al | 0.960302613 | 9.021283412 | 7.520980126 |
| 26 | O  | 2.726407661 | 11.82700715 | 13.14569087 | 66 | O  | 2.826526532 | 9.111694127 | 7.506894059 |
| 27 | O  | 2.714345416 | 8.989494103 | 13.14348052 | 67 | O  | 2.826579937 | 11.71563078 | 7.506791465 |
| 28 | O  | 2.784646447 | 6.209891587 | 13.08407167 | 68 | Al | 4.033481559 | 10.41367789 | 7.479321761 |
| 29 | Al | 3.785661939 | 10.40208835 | 13.07293212 | 69 | O  | 6.822562763 | 6.208743923 | 7.404648298 |
| 30 | Al | 0.745587802 | 6.206870144 | 13.04011761 | 70 | Al | 0.68469827  | 6.209931052 | 7.319241731 |
| 31 | O  | 0.725697213 | 10.41722584 | 11.89434974 | 71 | Al | 6.809695212 | 10.4139037  | 6.506956923 |
| 32 | Al | 6.853247843 | 10.42240779 | 11.89372682 | 72 | Al | 3.043030813 | 4.703040803 | 6.474073576 |
| 33 | Al | 2.925527271 | 4.75029688  | 11.82155344 | 73 | Al | 3.043098189 | 7.716230802 | 6.473740974 |
| 34 | Al | 2.924054467 | 7.662444493 | 11.81474724 | 74 | O  | 0.526214134 | 10.41408606 | 6.318591573 |
| 35 | O  | 0.981976506 | 4.879055572 | 11.7971988  | 75 | O  | 1.225194412 | 4.809146145 | 6.29012091  |
| 36 | O  | 0.977367744 | 7.533346383 | 11.78811713 | 76 | O  | 1.22531788  | 7.610218504 | 6.289372712 |
| 37 | Al | 5.834518546 | 6.208674207 | 11.73493731 | 77 | Al | 5.448174762 | 6.209445591 | 6.213186025 |
| 38 | O  | 4.982962466 | 10.41428654 | 11.73452308 | 78 | O  | 5.151163698 | 10.41379985 | 6.155664722 |
| 39 | O  | 4.762359469 | 4.803824638 | 11.65772636 | 79 | O  | 4.587244723 | 4.819647435 | 5.70649772  |
| 40 | O  | 4.761757502 | 7.614176806 | 11.65595474 | 80 | O  | 4.58747763  | 7.599400489 | 5.706490435 |

**Table S3(c).** Adsorption of NO on the surface oxynitride  $\gamma\text{-Al}_{32}\text{O}_{47}\text{N}^{\text{IV}}$  (110) in **Fig. 3(c)**

| #  | X  | Y           | Z            | #            | X  | Y  | Z           |              |              |
|----|----|-------------|--------------|--------------|----|----|-------------|--------------|--------------|
| 1  | O  | 3.138005017 | 9.002238418  | 16.635427605 | 41 | O  | 2.892887067 | 9.018707338  | 10.492383773 |
| 2  | O  | 3.137611988 | 11.827232851 | 16.635113398 | 42 | O  | 2.892898752 | 11.808729710 | 10.492498699 |
| 3  | O  | 2.463911523 | 6.210957622  | 16.019497733 | 43 | Al | 1.802458225 | 10.413730547 | 10.447762059 |
| 4  | Al | 2.304427955 | 10.414033231 | 16.002449108 | 44 | O  | 2.672043232 | 6.209518770  | 10.411560210 |
| 5  | O  | 6.418949212 | 9.014510933  | 15.894162954 | 45 | O  | 6.673248235 | 9.083807897  | 10.389011187 |
| 6  | O  | 6.418762023 | 11.813576122 | 15.894043550 | 46 | O  | 6.673242259 | 11.743585900 | 10.389007419 |
| 7  | O  | 7.048479029 | 6.209828485  | 15.826762878 | 47 | Al | 4.733540688 | 8.963956773  | 10.361715418 |
| 8  | Al | 4.623862674 | 8.925355875  | 15.745216228 | 48 | Al | 4.733527140 | 11.863475917 | 10.361770267 |
| 9  | Al | 4.623875393 | 11.902485986 | 15.744469678 | 49 | Al | 0.796772298 | 6.209569535  | 10.255310570 |
| 10 | Al | 0.721196415 | 6.209494089  | 15.609123046 | 50 | O  | 6.921567785 | 6.209559218  | 10.253787277 |
| 11 | Al | 7.136030883 | 10.414004616 | 14.959882042 | 51 | Al | 6.910945483 | 10.413696336 | 9.143640028  |
| 12 | N  | 0.928297503 | 10.413983694 | 14.780885850 | 52 | Al | 3.884195493 | 6.209569505  | 9.091702391  |
| 13 | O  | 4.397849060 | 10.414058052 | 14.712363010 | 53 | O  | 4.874305784 | 10.413687629 | 9.097733552  |
| 14 | O  | 4.795378138 | 7.528745187  | 14.694863231 | 54 | O  | 4.935738836 | 7.634784778  | 9.033929586  |
| 15 | O  | 4.794955661 | 4.891724280  | 14.695460846 | 55 | O  | 4.935746048 | 4.784322381  | 9.033974464  |
| 16 | Al | 3.661627143 | 6.210520788  | 14.564700370 | 56 | Al | 6.758038692 | 7.674474553  | 8.971764420  |
| 17 | Al | 6.664824004 | 7.640024895  | 14.586336131 | 57 | Al | 6.758071333 | 4.744685174  | 8.971746766  |
| 18 | Al | 6.664786561 | 4.779781855  | 14.586222212 | 58 | O  | 0.772484846 | 10.413677285 | 8.977562764  |
| 19 | O  | 0.608293875 | 4.899956699  | 14.394152613 | 59 | O  | 0.555486734 | 7.470566738  | 8.800493506  |
| 20 | O  | 0.608743630 | 7.519121854  | 14.394029803 | 60 | O  | 0.555558490 | 4.948529245  | 8.800531124  |
| 21 | O  | 7.021253721 | 9.136078147  | 13.392179563 | 61 | O  | 6.994909135 | 11.748688899 | 7.785431914  |
| 22 | O  | 7.020969627 | 11.691538421 | 13.392131663 | 62 | O  | 6.994897214 | 9.078723512  | 7.785420088  |
| 23 | Al | 0.885135886 | 11.787765087 | 13.345937234 | 63 | Al | 0.896739853 | 9.019106464  | 7.531213404  |
| 24 | Al | 0.885281421 | 9.040023074  | 13.346239952 | 64 | Al | 0.896717088 | 11.808236344 | 7.531197748  |
| 25 | O  | 6.784244346 | 6.209719418  | 13.194087965 | 65 | Al | 3.967116347 | 10.413691339 | 7.498720402  |
| 26 | O  | 2.691784423 | 8.954774763  | 13.110148181 | 66 | O  | 3.021831957 | 6.209532403  | 7.534839287  |
| 27 | O  | 2.691772322 | 11.872733728 | 13.110194481 | 67 | O  | 2.762911953 | 9.109658549  | 7.505236992  |
| 28 | Al | 3.694927045 | 10.413755631 | 13.072378040 | 68 | O  | 2.762885897 | 11.717699114 | 7.505264473  |
| 29 | O  | 2.698773720 | 6.209642878  | 13.078886340 | 69 | O  | 6.747267623 | 6.209530397  | 7.386731180  |
| 30 | Al | 0.659800850 | 6.209644775  | 12.990229793 | 70 | Al | 0.595728618 | 6.209541722  | 7.304297382  |
| 31 | Al | 6.809423704 | 10.413781004 | 11.949822801 | 71 | Al | 6.744903364 | 10.413678536 | 6.525317013  |
| 32 | O  | 0.664509773 | 10.413722831 | 11.923887075 | 72 | Al | 2.977093835 | 7.719511607  | 6.464975211  |
| 33 | Al | 2.827979565 | 7.674602880  | 11.774499898 | 73 | Al | 2.977116801 | 4.699565468  | 6.464950336  |
| 34 | Al | 2.828110941 | 4.744629147  | 11.774642244 | 74 | O  | 0.460964127 | 10.413658323 | 6.327304142  |
| 35 | O  | 4.932117850 | 10.413685654 | 11.771059041 | 75 | O  | 1.160610130 | 7.609597795  | 6.286895737  |
| 36 | O  | 0.910610986 | 7.526182565  | 11.763974717 | 76 | O  | 1.160616862 | 4.809454499  | 6.286909523  |
| 37 | O  | 0.910648701 | 4.892870327  | 11.764196042 | 77 | Al | 5.367018945 | 6.209525523  | 6.206503694  |
| 38 | Al | 5.761330611 | 6.209641321  | 11.703259860 | 78 | O  | 5.084384280 | 10.413676003 | 6.169187017  |
| 39 | O  | 4.683904750 | 7.607456373  | 11.658017895 | 79 | O  | 4.515303170 | 7.601324988  | 5.678961781  |
| 40 | O  | 4.684019121 | 4.811683116  | 11.658158128 | 80 | O  | 4.515334406 | 4.817701870  | 5.678944570  |
|    |    |             |              |              | 81 | N  | 2.845225620 | 6.191778145  | 17.678682130 |
|    |    |             |              |              | 82 | O  | 3.964941802 | 6.211427521  | 17.873541115 |

**Table S5(a). NO(1) in Fig. 5(a)**

| #  |    | X         | Y           | Z         | #  |    | X         | Y           | Z         |
|----|----|-----------|-------------|-----------|----|----|-----------|-------------|-----------|
| 1  | O  | 3.1677392 | 11.79151283 | 16.458745 | 41 | O  | 2.9862125 | 11.81892875 | 10.513454 |
| 2  | O  | 3.1677168 | 9.034508607 | 16.458286 | 42 | O  | 2.9861964 | 9.008318587 | 10.513546 |
| 3  | O  | 2.5967865 | 6.208909679 | 16.018651 | 43 | Al | 1.9144431 | 10.41362908 | 10.434679 |
| 4  | Al | 2.2218998 | 10.41312675 | 16.052053 | 44 | O  | 2.763228  | 6.20950044  | 10.432135 |
| 5  | O  | 6.5228358 | 9.009624716 | 15.881177 | 45 | O  | 6.771669  | 9.087443021 | 10.38004  |
| 6  | O  | 6.5232744 | 11.81656443 | 15.881781 | 46 | O  | 6.7716521 | 11.73995484 | 10.380099 |
| 7  | O  | 7.22433   | 6.209055122 | 15.85206  | 47 | Al | 4.8238568 | 11.86621806 | 10.355312 |
| 8  | Al | 4.7013727 | 11.91123134 | 15.67846  | 48 | Al | 4.8238294 | 8.961144179 | 10.355293 |
| 9  | Al | 4.7012815 | 8.914918305 | 15.677813 | 49 | O  | 7.0223926 | 6.209569027 | 10.270617 |
| 10 | Al | 0.9385875 | 6.209225012 | 15.648886 | 50 | Al | 0.8952276 | 6.209505501 | 10.265704 |
| 11 | Al | 7.0398835 | 10.41313403 | 14.833313 | 51 | Al | 7.0045919 | 10.41373722 | 9.1296671 |
| 12 | O  | 0.9215817 | 10.41337945 | 14.751557 | 52 | Al | 3.9745613 | 6.209576469 | 9.1106221 |
| 13 | Al | 3.7149862 | 6.208861806 | 14.686323 | 53 | O  | 4.9660935 | 10.41371643 | 9.0886894 |
| 14 | O  | 4.9211964 | 7.509658806 | 14.660116 | 54 | O  | 5.0310516 | 7.632185983 | 9.0330418 |
| 15 | O  | 4.9213588 | 4.90812242  | 14.660596 | 55 | O  | 5.0310769 | 4.786990086 | 9.0331024 |
| 16 | Al | 6.7877301 | 7.602462756 | 14.644277 | 56 | O  | 0.8718603 | 10.41370467 | 8.9738393 |
| 17 | Al | 6.7878608 | 4.815632086 | 14.644342 | 57 | Al | 6.8556402 | 4.749414379 | 8.9757012 |
| 18 | O  | 4.7416604 | 10.41327923 | 14.593168 | 58 | Al | 6.8556296 | 7.66976174  | 8.9756741 |
| 19 | O  | 0.6887576 | 7.546917041 | 14.393941 | 59 | O  | 0.6550486 | 7.4727728   | 8.8140722 |
| 20 | O  | 0.6888003 | 4.871514073 | 14.393866 | 60 | O  | 0.6550566 | 4.946350386 | 8.8140321 |
| 21 | O  | 7.1235502 | 9.14593214  | 13.354944 | 61 | O  | 7.0932276 | 11.75143136 | 7.7808942 |
| 22 | O  | 7.1234616 | 11.68088324 | 13.355233 | 62 | O  | 7.0932536 | 9.076075757 | 7.7808775 |
| 23 | Al | 0.9317168 | 8.965916949 | 13.217887 | 63 | O  | 3.0976202 | 6.209598302 | 7.5566954 |
| 24 | Al | 0.9317424 | 11.86081226 | 13.218012 | 64 | Al | 0.9927878 | 11.8070402  | 7.5297962 |
| 25 | O  | 6.9097652 | 6.209227588 | 13.202158 | 65 | Al | 0.9927968 | 9.020425533 | 7.5297865 |
| 26 | O  | 2.7567605 | 8.990213244 | 13.141257 | 66 | O  | 2.8593018 | 11.71565297 | 7.5100507 |
| 27 | O  | 2.7567642 | 11.83679903 | 13.141201 | 67 | O  | 2.8593213 | 9.111826503 | 7.5100711 |
| 28 | O  | 2.8143199 | 6.209278801 | 13.08633  | 68 | Al | 4.0653048 | 10.41375006 | 7.488426  |
| 29 | Al | 3.8108317 | 10.41353169 | 13.069791 | 69 | O  | 6.8527788 | 6.209621665 | 7.4049201 |
| 30 | Al | 0.7759395 | 6.209252447 | 13.039557 | 70 | Al | 0.7080055 | 6.209584403 | 7.322358  |
| 31 | Al | 6.8891004 | 10.41352434 | 11.908161 | 71 | Al | 6.8436391 | 10.41376386 | 6.5171707 |
| 32 | O  | 0.7599987 | 10.41352206 | 11.906031 | 72 | Al | 3.0744473 | 4.703530207 | 6.4790378 |
| 33 | Al | 2.9541539 | 4.754416589 | 11.820262 | 73 | Al | 3.0744352 | 7.715669201 | 6.4790606 |
| 34 | Al | 2.9542315 | 7.664366558 | 11.820327 | 74 | O  | 0.5590905 | 10.41373481 | 6.324847  |
| 35 | O  | 1.0111037 | 7.536389097 | 11.793253 | 75 | O  | 1.2577632 | 7.608858688 | 6.2949706 |
| 36 | O  | 1.0110953 | 4.882317792 | 11.793135 | 76 | O  | 1.2577777 | 4.810327885 | 6.2949583 |
| 37 | O  | 5.0178152 | 10.41361165 | 11.738243 | 77 | Al | 5.4747776 | 6.209619524 | 6.2232306 |
| 38 | Al | 5.8651887 | 6.209469568 | 11.743023 | 78 | O  | 5.1833482 | 10.41375316 | 6.1601659 |
| 39 | O  | 4.7933225 | 4.805175776 | 11.657619 | 79 | O  | 4.6167019 | 7.598828745 | 5.702601  |
| 40 | O  | 4.7933598 | 7.613790048 | 11.657554 | 80 | O  | 4.6167238 | 4.820387072 | 5.7026014 |
|    |    |           |             |           | 81 | O  | 0.8248796 | 10.40258222 | 17.735701 |
|    |    |           |             |           | 82 | N  | 1.1208527 | 10.4332603  | 18.868187 |

**Table S5(b). NO(2) in Fig. 5(b)**

| #  |    | X           | Y           | Z           | #  |    | X           | Y           | Z           |
|----|----|-------------|-------------|-------------|----|----|-------------|-------------|-------------|
| 1  | O  | 3.131557015 | 11.80827868 | 16.48877695 | 41 | O  | 2.944266145 | 11.81677802 | 10.50572473 |
| 2  | O  | 3.131551015 | 9.01888158  | 16.48870091 | 42 | O  | 2.94428288  | 9.010461629 | 10.50572454 |
| 3  | O  | 2.577664696 | 6.209411733 | 15.9359803  | 43 | Al | 1.869747219 | 10.41361613 | 10.42910828 |
| 4  | Al | 2.286420732 | 10.41359525 | 15.95300196 | 44 | O  | 2.715605204 | 6.209476432 | 10.41872122 |
| 5  | O  | 6.475907808 | 9.014362185 | 15.8721437  | 45 | O  | 6.729421314 | 9.086888728 | 10.37518863 |
| 6  | O  | 6.475884629 | 11.81291716 | 15.87212992 | 46 | O  | 6.729397092 | 11.74039749 | 10.3751807  |
| 7  | O  | 7.125750466 | 6.209483445 | 15.80637958 | 47 | Al | 4.783684384 | 11.86683798 | 10.34660259 |
| 8  | Al | 4.662736306 | 11.92471605 | 15.68640013 | 48 | Al | 4.783699863 | 8.960423225 | 10.34660106 |
| 9  | Al | 4.662765496 | 8.902545473 | 15.68639222 | 49 | O  | 6.979424319 | 6.209496826 | 10.25574156 |
| 10 | Al | 0.866717093 | 6.209411617 | 15.7298345  | 50 | Al | 0.846771345 | 6.209468112 | 10.26433813 |
| 11 | Al | 7.048253941 | 10.41364387 | 14.86084851 | 51 | Al | 6.96405412  | 10.41363839 | 9.125051642 |
| 12 | O  | 0.898195759 | 10.41361019 | 14.77698679 | 52 | Al | 3.930481299 | 6.209478897 | 9.098802364 |
| 13 | Al | 3.702866183 | 6.209493896 | 14.62661319 | 53 | O  | 4.924180508 | 10.41362496 | 9.084247395 |
| 14 | O  | 4.879925253 | 7.527618528 | 14.62454945 | 54 | O  | 4.988135514 | 7.632153658 | 9.023055936 |
| 15 | O  | 4.879920531 | 4.891355159 | 14.62455459 | 55 | O  | 4.988149999 | 4.786824044 | 9.02305997  |
| 16 | Al | 6.744864786 | 7.603748551 | 14.62217563 | 56 | O  | 0.829874561 | 10.41360828 | 8.96814993  |
| 17 | Al | 6.744856726 | 4.815239974 | 14.62215685 | 57 | Al | 6.813001006 | 4.75064646  | 8.962327524 |
| 18 | O  | 4.607523101 | 10.41363049 | 14.62339491 | 58 | Al | 6.812983867 | 7.668337945 | 8.962329905 |
| 19 | O  | 0.643380545 | 7.544752421 | 14.40884478 | 59 | O  | 0.613328244 | 7.473212505 | 8.807836854 |
| 20 | O  | 0.643381761 | 4.874157981 | 14.40882767 | 60 | O  | 0.613341466 | 4.945708166 | 8.807837231 |
| 21 | O  | 7.088068473 | 9.153132379 | 13.3596605  | 61 | O  | 7.051768015 | 11.75028414 | 7.774737408 |
| 22 | O  | 7.088038793 | 11.67415723 | 13.35964491 | 62 | O  | 7.051788321 | 9.076990677 | 7.774747952 |
| 23 | Al | 0.886199099 | 8.947493359 | 13.204112   | 63 | O  | 3.052503431 | 6.209473675 | 7.546156913 |
| 24 | Al | 0.886175777 | 11.8797218  | 13.20409322 | 64 | Al | 0.951909932 | 11.80718196 | 7.522732179 |
| 25 | O  | 6.873163982 | 6.20949769  | 13.17633829 | 65 | Al | 0.951916345 | 9.020020704 | 7.522739416 |
| 26 | O  | 2.708174327 | 8.988421438 | 13.13114569 | 66 | O  | 2.818405162 | 11.71607558 | 7.503262826 |
| 27 | O  | 2.70815403  | 11.83883071 | 13.13114751 | 67 | O  | 2.818415469 | 9.111133906 | 7.50328859  |
| 28 | O  | 2.776333062 | 6.209481924 | 13.05935372 | 68 | Al | 4.024056629 | 10.41361039 | 7.481661205 |
| 29 | Al | 3.760586013 | 10.41363006 | 13.05708562 | 69 | O  | 6.811881789 | 6.209494973 | 7.395463981 |
| 30 | Al | 0.743546408 | 6.209467597 | 13.06418234 | 70 | Al | 0.671478865 | 6.209456147 | 7.316488837 |
| 31 | Al | 6.848252541 | 10.41363739 | 11.908352   | 71 | Al | 6.801781369 | 10.41363456 | 6.51017024  |
| 32 | O  | 0.717573205 | 10.41361143 | 11.90349057 | 72 | Al | 3.033637007 | 4.702221605 | 6.468695616 |
| 33 | Al | 2.909769324 | 4.754810259 | 11.80416304 | 73 | Al | 3.03360971  | 7.716719748 | 6.468688175 |
| 34 | Al | 2.909752731 | 7.664142832 | 11.80415359 | 74 | O  | 0.517887252 | 10.41359903 | 6.318784293 |
| 35 | O  | 0.966560297 | 7.533546659 | 11.79640191 | 75 | O  | 1.216197122 | 7.609696092 | 6.287167626 |
| 36 | O  | 0.966577168 | 4.885394541 | 11.79639432 | 76 | O  | 1.2162239   | 4.809225136 | 6.287167536 |
| 37 | O  | 4.977898046 | 10.41363082 | 11.73919367 | 77 | Al | 5.434779534 | 6.209484852 | 6.209296829 |
| 38 | Al | 5.825933001 | 6.209491312 | 11.72559952 | 78 | O  | 5.141965856 | 10.41359902 | 6.155333793 |
| 39 | O  | 4.749592045 | 4.806779516 | 11.64478926 | 79 | O  | 4.57572044  | 7.599166968 | 5.693369524 |
| 40 | O  | 4.749577756 | 7.612191062 | 11.64478003 | 80 | O  | 4.575769739 | 4.819765477 | 5.693403331 |
|    |    |             |             |             | 81 | N  | 1.088508084 | 6.210605879 | 17.76531416 |
|    |    |             |             |             | 82 | O  | 1.442180394 | 6.20906646  | 18.87039236 |

**Table S5(c). NO(3) in Fig. 5(c)**

| #  |    | X           | Y           | Z           | #  |    | X           | Y           | Z           |
|----|----|-------------|-------------|-------------|----|----|-------------|-------------|-------------|
| 1  | O  | 3.146985337 | 11.76790766 | 16.49273105 | 41 | O  | 2.954173184 | 11.82121532 | 10.51107637 |
| 2  | O  | 3.000432487 | 8.974497791 | 16.35287226 | 42 | O  | 2.954817174 | 9.005901909 | 10.49888568 |
| 3  | O  | 2.55884377  | 6.179557085 | 16.01413237 | 43 | Al | 1.886707775 | 10.41450092 | 10.42221102 |
| 4  | Al | 2.24705594  | 10.44158975 | 15.887316   | 44 | O  | 2.732114185 | 6.208943625 | 10.42462772 |
| 5  | O  | 6.550887067 | 9.025392802 | 15.84698832 | 45 | O  | 6.736962768 | 9.087579025 | 10.36766302 |
| 6  | O  | 6.494873242 | 11.82485429 | 15.86347877 | 46 | O  | 6.736467945 | 11.73831897 | 10.36967219 |
| 7  | O  | 7.189929605 | 6.219208927 | 15.84064976 | 47 | Al | 4.789579537 | 11.86628848 | 10.34779948 |
| 8  | Al | 4.676701209 | 11.92753458 | 15.69414744 | 48 | Al | 4.791880066 | 8.960016028 | 10.34628775 |
| 9  | Al | 4.692481572 | 8.903433267 | 15.81309713 | 49 | O  | 6.990990565 | 6.207803615 | 10.26100997 |
| 10 | Al | 0.902387166 | 6.220084653 | 15.6429813  | 50 | Al | 0.864437653 | 6.207724632 | 10.25302853 |
| 11 | Al | 7.023013244 | 10.42735695 | 14.81449681 | 51 | Al | 6.972595406 | 10.41266337 | 9.117809221 |
| 12 | O  | 0.881496779 | 10.44903004 | 14.70978741 | 52 | Al | 3.940002904 | 6.207124513 | 9.098980723 |
| 13 | Al | 3.682037673 | 6.22878926  | 14.6896673  | 53 | O  | 4.931275968 | 10.41306492 | 9.082673699 |
| 14 | O  | 4.888773833 | 7.528595503 | 14.72695444 | 54 | O  | 4.999033649 | 7.627843821 | 9.027644654 |
| 15 | O  | 4.880711199 | 4.915251187 | 14.65919778 | 55 | O  | 4.997205893 | 4.785458768 | 9.02531803  |
| 16 | Al | 6.753951085 | 7.618313157 | 14.63520728 | 56 | O  | 0.840517146 | 10.41267884 | 8.963200089 |
| 17 | Al | 6.751319105 | 4.829400706 | 14.63402452 | 57 | Al | 6.82163243  | 4.749111145 | 8.963739949 |
| 18 | O  | 4.651410078 | 10.39558371 | 14.65505355 | 58 | Al | 6.823131773 | 7.668242283 | 8.964124469 |
| 19 | O  | 0.657065226 | 7.553084401 | 14.3732782  | 59 | O  | 0.622715395 | 7.47105444  | 8.804002527 |
| 20 | O  | 0.649494891 | 4.878231754 | 14.3788898  | 60 | O  | 0.62264791  | 4.944091661 | 8.806117217 |
| 21 | O  | 7.087779118 | 9.154580343 | 13.32659923 | 61 | O  | 7.061049539 | 11.74995469 | 7.771528295 |
| 22 | O  | 7.079848768 | 11.68917375 | 13.33532493 | 62 | O  | 7.060845516 | 9.074490389 | 7.770538136 |
| 23 | Al | 0.886836457 | 8.957502548 | 13.1730515  | 63 | O  | 3.061407342 | 6.208695041 | 7.547050781 |
| 24 | Al | 0.89209309  | 11.87170603 | 13.19106052 | 64 | Al | 0.960677937 | 11.80470074 | 7.520178766 |
| 25 | O  | 6.86812948  | 6.219843895 | 13.19418205 | 65 | Al | 0.960914016 | 9.018947227 | 7.519005698 |
| 26 | O  | 2.712263257 | 8.994295558 | 13.12101485 | 66 | O  | 2.827123144 | 11.7155321  | 7.503364302 |
| 27 | O  | 2.726363675 | 11.82874159 | 13.14243153 | 67 | O  | 2.827006277 | 9.110732674 | 7.498864063 |
| 28 | O  | 2.788669802 | 6.215477317 | 13.08016792 | 68 | Al | 4.032786444 | 10.41298431 | 7.479728202 |
| 29 | Al | 3.78874709  | 10.40073335 | 13.08320384 | 69 | O  | 6.820179455 | 6.207064424 | 7.395141934 |
| 30 | Al | 0.742641511 | 6.213047516 | 13.0334431  | 70 | Al | 0.677007479 | 6.207697472 | 7.312502061 |
| 31 | Al | 6.852825294 | 10.42006934 | 11.89164384 | 71 | Al | 6.811252311 | 10.41241115 | 6.50587756  |
| 32 | O  | 0.724145042 | 10.41924559 | 11.8840039  | 72 | Al | 3.041904666 | 4.70167535  | 6.469463193 |
| 33 | Al | 2.929422475 | 4.754132142 | 11.82183891 | 73 | Al | 3.042324216 | 7.714723967 | 6.467543009 |
| 34 | Al | 2.923476982 | 7.663758738 | 11.80775926 | 74 | O  | 0.527009843 | 10.41219826 | 6.31477012  |
| 35 | O  | 0.975954938 | 7.533796037 | 11.7762641  | 75 | O  | 1.225239104 | 7.607122362 | 6.28512948  |
| 36 | O  | 0.98312428  | 4.883693375 | 11.78826667 | 76 | O  | 1.225016839 | 4.807562249 | 6.286299425 |
| 37 | O  | 4.982895383 | 10.41313148 | 11.74066226 | 77 | Al | 5.443477091 | 6.208319335 | 6.209539005 |
| 38 | Al | 5.832743435 | 6.211958626 | 11.73089865 | 78 | O  | 5.151024606 | 10.41319731 | 6.153722291 |
| 39 | O  | 4.764377864 | 4.805689993 | 11.65037269 | 79 | O  | 4.585422192 | 7.598568809 | 5.694459389 |
| 40 | O  | 4.761944277 | 7.617479544 | 11.65484065 | 80 | O  | 4.583544987 | 4.819437712 | 5.694251536 |
|    |    |             |             |             | 81 | N  | 4.784249441 | 9.174515693 | 17.93447281 |
|    |    |             |             |             | 82 | O  | 4.649317182 | 8.572438239 | 18.92215855 |

**Table S6(a).  $^2\text{H}(1)$  in Fig. 6(a)**

| #  |    | X           | Y           | Z           | #  |    | X           | Y           | Z           |
|----|----|-------------|-------------|-------------|----|----|-------------|-------------|-------------|
| 1  | O  | 3.15406151  | 11.8984066  | 16.446087   | 41 | O  | 2.978531912 | 11.79795057 | 10.51962845 |
| 2  | O  | 3.225234545 | 9.192527183 | 16.54401979 | 42 | O  | 2.97692598  | 8.990571266 | 10.5107775  |
| 3  | O  | 2.568589821 | 5.990848472 | 16.03466787 | 43 | Al | 1.902653103 | 10.39442001 | 10.43818808 |
| 4  | Al | 1.99196371  | 10.41076848 | 16.36306492 | 44 | O  | 2.75445498  | 6.1917349   | 10.44053941 |
| 5  | O  | 6.51133066  | 8.998400388 | 15.87628863 | 45 | O  | 6.761022153 | 9.069465119 | 10.38969608 |
| 6  | O  | 6.527154623 | 11.80246589 | 15.87292496 | 46 | O  | 6.761495597 | 11.72273967 | 10.38907512 |
| 7  | O  | 7.186191865 | 6.195444287 | 15.843611   | 47 | Al | 4.818301165 | 11.8466388  | 10.36641332 |
| 8  | Al | 4.747074512 | 11.85703741 | 15.62942707 | 48 | Al | 4.815693822 | 8.945791368 | 10.36280498 |
| 9  | Al | 4.691100186 | 8.935139579 | 15.70298383 | 49 | O  | 7.012991965 | 6.192491129 | 10.27677982 |
| 10 | Al | 0.88747844  | 6.189201284 | 15.65330109 | 50 | Al | 0.883352937 | 6.19271011  | 10.2721404  |
| 11 | Al | 7.115598694 | 10.39145869 | 14.87432598 | 51 | Al | 6.994901208 | 10.39673376 | 9.138499564 |
| 12 | O  | 0.944367403 | 10.39746278 | 14.71134575 | 52 | Al | 3.963636526 | 6.191782483 | 9.114044327 |
| 13 | Al | 3.703294388 | 6.187758641 | 14.66601224 | 53 | O  | 4.957876479 | 10.39663036 | 9.096820946 |
| 14 | O  | 4.871872055 | 7.501473354 | 14.71237419 | 54 | O  | 5.021273522 | 7.613375548 | 9.043620917 |
| 15 | O  | 4.905091278 | 4.891439794 | 14.66752939 | 55 | O  | 5.021252833 | 4.770505416 | 9.044867598 |
| 16 | Al | 6.75579623  | 7.599716324 | 14.64540598 | 56 | O  | 0.860602161 | 10.39675264 | 8.979232533 |
| 17 | Al | 6.782328265 | 4.796009089 | 14.62212866 | 57 | Al | 6.8460044   | 4.731073896 | 8.980712246 |
| 18 | O  | 4.707617401 | 10.40067457 | 14.59500573 | 58 | Al | 6.845528895 | 7.651520872 | 8.977608833 |
| 19 | O  | 0.715907614 | 7.522643777 | 14.4233166  | 59 | O  | 0.645590987 | 7.45591377  | 8.82298511  |
| 20 | O  | 0.670271106 | 4.855489882 | 14.39882386 | 60 | O  | 0.645916709 | 4.929197604 | 8.822650905 |
| 21 | O  | 7.126642248 | 9.11426363  | 13.37333041 | 61 | O  | 7.083691787 | 11.7346291  | 7.788098769 |
| 22 | O  | 7.115723092 | 11.66157734 | 13.3630199  | 62 | O  | 7.083120696 | 9.059249147 | 7.788435482 |
| 23 | Al | 0.945101591 | 8.96919679  | 13.25913533 | 63 | O  | 3.079241911 | 6.192605464 | 7.56593507  |
| 24 | Al | 0.932957358 | 11.82399951 | 13.23703937 | 64 | Al | 0.982653863 | 11.78936383 | 7.534776998 |
| 25 | O  | 6.892106428 | 6.206417235 | 13.21141749 | 65 | Al | 0.982773232 | 9.00434939  | 7.535086567 |
| 26 | O  | 2.759744727 | 8.959473766 | 13.13703654 | 66 | O  | 2.849281008 | 11.69950502 | 7.517783746 |
| 27 | O  | 2.755375457 | 11.83650834 | 13.14679234 | 67 | O  | 2.849081609 | 9.09587721  | 7.518018648 |
| 28 | O  | 2.79918584  | 6.194071532 | 13.09686814 | 68 | Al | 4.055745801 | 10.3975697  | 7.495436376 |
| 29 | Al | 3.785371943 | 10.39626323 | 13.07701468 | 69 | O  | 6.844422324 | 6.193427472 | 7.414966212 |
| 30 | Al | 0.766465976 | 6.195581918 | 13.04011195 | 70 | Al | 0.703947046 | 6.192508868 | 7.331555555 |
| 31 | Al | 6.881807174 | 10.38751817 | 11.92446713 | 71 | Al | 6.832545437 | 10.39699956 | 6.523181085 |
| 32 | O  | 0.754312729 | 10.39423442 | 11.91070936 | 72 | Al | 3.064348939 | 4.686402931 | 6.484772901 |
| 33 | Al | 2.940017248 | 4.735136355 | 11.81691825 | 73 | Al | 3.065128744 | 7.699743731 | 6.4867975   |
| 34 | Al | 2.938395227 | 7.651425873 | 11.81421142 | 74 | O  | 0.548427792 | 10.3966963  | 6.331512158 |
| 35 | O  | 1.001547583 | 7.519091357 | 11.80322735 | 75 | O  | 1.247938254 | 7.592926425 | 6.302802624 |
| 36 | O  | 1.000538282 | 4.86778193  | 11.80032582 | 76 | O  | 1.247178888 | 4.792754982 | 6.301955115 |
| 37 | O  | 5.007139609 | 10.39418106 | 11.75183091 | 77 | Al | 5.469770403 | 6.193871467 | 6.227038673 |
| 38 | Al | 5.854842787 | 6.195394473 | 11.73818354 | 78 | O  | 5.17299213  | 10.39914666 | 6.168791007 |
| 39 | O  | 4.782987517 | 4.79061906  | 11.66923713 | 79 | O  | 4.610044537 | 7.584747195 | 5.718014179 |
| 40 | O  | 4.781237685 | 7.596770024 | 11.66855009 | 80 | O  | 4.607959813 | 4.805613426 | 5.714331571 |
|    |    |             |             |             | 81 | H  | 0.851609579 | 10.58232877 | 17.44598854 |
|    |    |             |             |             | 82 | H  | 2.818165189 | 12.86936636 | 16.43574069 |



**Table S6(b).  $2H(2)$  in Fig. 6(b)**

| #  |    | X           | Y           | Z           | #  |    | X           | Y           | Z           |
|----|----|-------------|-------------|-------------|----|----|-------------|-------------|-------------|
| 1  | O  | 3.037098992 | 11.81340671 | 16.45394845 | 41 | O  | 2.974372075 | 11.81755931 | 10.51602019 |
| 2  | O  | 3.160691456 | 9.098386723 | 16.4625666  | 42 | O  | 2.968468172 | 9.014191168 | 10.5061851  |
| 3  | O  | 2.590009006 | 6.219499906 | 16.00127751 | 43 | Al | 1.893539103 | 10.41920747 | 10.43899718 |
| 4  | Al | 1.991094424 | 10.40393354 | 16.38195867 | 44 | O  | 2.753568768 | 6.209997213 | 10.42656834 |
| 5  | O  | 6.499640177 | 8.996942424 | 15.86762514 | 45 | O  | 6.758521138 | 9.089036645 | 10.37040138 |
| 6  | O  | 6.483859498 | 11.77646177 | 15.97386706 | 46 | O  | 6.758742401 | 11.73901737 | 10.38284328 |
| 7  | O  | 7.199827417 | 6.16341218  | 15.83562009 | 47 | Al | 4.811289112 | 11.86748007 | 10.35662838 |
| 8  | Al | 4.50232582  | 11.89302254 | 15.63093874 | 48 | Al | 4.805777215 | 8.965395775 | 10.34466606 |
| 9  | Al | 4.661356579 | 8.920638269 | 15.68115411 | 49 | O  | 7.011097252 | 6.21264908  | 10.26136528 |
| 10 | Al | 0.928824516 | 6.20594113  | 15.65313879 | 50 | Al | 0.88536433  | 6.207910575 | 10.26467588 |
| 11 | Al | 7.025385591 | 10.34014134 | 14.77286371 | 51 | Al | 6.990869819 | 10.41757064 | 9.12198922  |
| 12 | O  | 0.876891415 | 10.39638278 | 14.66873673 | 52 | Al | 3.959487225 | 6.212403524 | 9.101198775 |
| 13 | Al | 3.707431731 | 6.212160679 | 14.67912711 | 53 | O  | 4.953691947 | 10.41836141 | 9.084923181 |
| 14 | O  | 4.906427996 | 7.509521401 | 14.65645492 | 54 | O  | 5.018347702 | 7.634247834 | 9.025583601 |
| 15 | O  | 4.929349157 | 4.887820099 | 14.69377106 | 55 | O  | 5.01898268  | 4.79093239  | 9.036802265 |
| 16 | Al | 6.766663237 | 7.593356867 | 14.64542869 | 56 | O  | 0.857682188 | 10.41806808 | 8.972618709 |
| 17 | Al | 6.775511972 | 4.850132636 | 14.54318324 | 57 | Al | 6.843187187 | 4.754528093 | 8.96626127  |
| 18 | O  | 4.805921572 | 10.43767456 | 14.58203493 | 58 | Al | 6.84423446  | 7.672081021 | 8.963819459 |
| 19 | O  | 0.655944516 | 7.535445288 | 14.39557344 | 59 | O  | 0.644044383 | 7.475028478 | 8.810089873 |
| 20 | O  | 0.671408943 | 4.869137884 | 14.38982978 | 60 | O  | 0.643304272 | 4.94784854  | 8.810429624 |
| 21 | O  | 7.0939388   | 9.121477147 | 13.31775158 | 61 | O  | 7.079244779 | 11.75485674 | 7.778096358 |
| 22 | O  | 7.067508866 | 11.68975982 | 13.41684787 | 62 | O  | 7.081864207 | 9.079725494 | 7.774055527 |
| 23 | Al | 0.936235352 | 8.98564285  | 13.25855439 | 63 | O  | 3.079401349 | 6.213145735 | 7.550686509 |
| 24 | Al | 0.946496708 | 11.81179656 | 13.29018083 | 64 | Al | 0.981924264 | 11.81129986 | 7.527591125 |
| 25 | O  | 6.886715678 | 6.204825461 | 13.18306019 | 65 | Al | 0.982179767 | 9.024572634 | 7.526169407 |
| 26 | O  | 2.760416722 | 8.981162003 | 13.13718603 | 66 | O  | 2.848179372 | 11.72142265 | 7.508384445 |
| 27 | O  | 2.771815891 | 11.84002399 | 13.15634685 | 67 | O  | 2.848163307 | 9.116088921 | 7.505422453 |
| 28 | O  | 2.809256366 | 6.205089694 | 13.08459951 | 68 | Al | 4.053314292 | 10.41879977 | 7.483030723 |
| 29 | Al | 3.808069587 | 10.40297357 | 13.08022557 | 69 | O  | 6.841515029 | 6.212095661 | 7.401907328 |
| 30 | Al | 0.781066217 | 6.207159927 | 13.03060569 | 70 | Al | 0.702137793 | 6.213657696 | 7.319286003 |
| 31 | Al | 6.879023591 | 10.40046494 | 11.88743979 | 71 | Al | 6.832062138 | 10.41790637 | 6.509837111 |
| 32 | O  | 0.737541953 | 10.42870809 | 11.91194668 | 72 | Al | 3.062260397 | 4.706338238 | 6.471940903 |
| 33 | Al | 2.935329552 | 4.748102614 | 11.81815869 | 73 | Al | 3.063174286 | 7.720894994 | 6.472146845 |
| 34 | Al | 2.937549624 | 7.668033025 | 11.80920539 | 74 | O  | 0.548347091 | 10.41930332 | 6.323206148 |
| 35 | O  | 1.005004439 | 7.536721473 | 11.79348539 | 75 | O  | 1.245864781 | 7.614155433 | 6.290294283 |
| 36 | O  | 1.002832271 | 4.88045859  | 11.79315146 | 76 | O  | 1.245183433 | 4.812891238 | 6.290723391 |
| 37 | O  | 5.006375603 | 10.41258186 | 11.73686172 | 77 | Al | 5.46631562  | 6.213668149 | 6.213262017 |
| 38 | Al | 5.846570343 | 6.216642779 | 11.71488261 | 78 | O  | 5.171898493 | 10.41842514 | 6.157186565 |
| 39 | O  | 4.781507395 | 4.806251683 | 11.6626258  | 79 | O  | 4.606695303 | 7.603337971 | 5.700376248 |
| 40 | O  | 4.777574086 | 7.61807479  | 11.64618737 | 80 | O  | 4.606862332 | 4.823084604 | 5.702248158 |
|    |    |             |             |             | 81 | H  | 0.714891117 | 10.48862636 | 17.36168169 |
|    |    |             |             |             | 82 | H  | 6.961962626 | 11.77524256 | 16.82766141 |

**Table S6(c). H(3) in Fig. 6(c)**

| #  |    | X           | Y           | Z           | #  |    | X           | Y           | Z           |
|----|----|-------------|-------------|-------------|----|----|-------------|-------------|-------------|
| 1  | O  | 3.225812757 | 11.6177252  | 16.57921314 | 41 | O  | 2.958706805 | 11.83491033 | 10.50801191 |
| 2  | O  | 3.147034366 | 8.917958786 | 16.47878911 | 42 | O  | 2.959879241 | 9.025659227 | 10.51470018 |
| 3  | O  | 2.550918001 | 6.422107203 | 16.03254796 | 43 | Al | 1.885277053 | 10.43029623 | 10.43522293 |
| 4  | Al | 1.972953196 | 10.41731866 | 16.37270353 | 44 | O  | 2.73701699  | 6.224645431 | 10.43732162 |
| 5  | O  | 6.518127818 | 9.024445614 | 15.87298689 | 45 | O  | 6.742651875 | 9.102919971 | 10.38567964 |
| 6  | O  | 6.50054509  | 11.82594566 | 15.87603182 | 46 | O  | 6.742593138 | 11.75616468 | 10.38723176 |
| 7  | O  | 7.167705631 | 6.222817239 | 15.84133768 | 47 | Al | 4.797131615 | 11.8796378  | 10.36114569 |
| 8  | Al | 4.679707765 | 11.8886775  | 15.71446789 | 48 | Al | 4.799378532 | 8.978419245 | 10.36309481 |
| 9  | Al | 4.734353526 | 8.967372629 | 15.64305681 | 49 | O  | 6.995587709 | 6.224733105 | 10.27341631 |
| 10 | Al | 0.869364172 | 6.228820876 | 15.65089711 | 50 | Al | 0.866505685 | 6.224853595 | 10.26806472 |
| 11 | Al | 7.095059771 | 10.43451327 | 14.86415118 | 51 | Al | 6.977057805 | 10.42927048 | 9.135801159 |
| 12 | O  | 0.921636687 | 10.42663659 | 14.69887369 | 52 | Al | 3.946173263 | 6.225590774 | 9.110780932 |
| 13 | Al | 3.687011226 | 6.230810445 | 14.66492546 | 53 | O  | 4.939512712 | 10.4293936  | 9.094935089 |
| 14 | O  | 4.887739271 | 7.529607169 | 14.66910845 | 54 | O  | 5.003395765 | 7.64720551  | 9.040575604 |
| 15 | O  | 4.852323637 | 4.913210303 | 14.71938016 | 55 | O  | 5.003691092 | 4.804054899 | 9.04171238  |
| 16 | Al | 6.7650754   | 7.621831086 | 14.6184889  | 56 | O  | 0.843355047 | 10.42914645 | 8.975856314 |
| 17 | Al | 6.738658416 | 4.817986968 | 14.64383891 | 57 | Al | 6.8277847   | 4.765669209 | 8.97530741  |
| 18 | O  | 4.685087848 | 10.42334933 | 14.60332839 | 58 | Al | 6.828090756 | 7.686382831 | 8.977645948 |
| 19 | O  | 0.651071715 | 7.560132473 | 14.39245849 | 59 | O  | 0.628270525 | 7.488231668 | 8.819299143 |
| 20 | O  | 0.695267416 | 4.895309876 | 14.41821114 | 60 | O  | 0.628202595 | 4.961464294 | 8.819466599 |
| 21 | O  | 7.094001359 | 9.162829734 | 13.35735662 | 61 | O  | 7.065549959 | 11.76664275 | 7.786108889 |
| 22 | O  | 7.103977188 | 11.71187637 | 13.36816387 | 62 | O  | 7.066048058 | 9.091530107 | 7.785527257 |
| 23 | Al | 0.913813247 | 9.000096959 | 13.23087328 | 63 | O  | 3.0635689   | 6.225001926 | 7.561752712 |
| 24 | Al | 0.92462404  | 11.85869946 | 13.25094352 | 64 | Al | 0.965597855 | 11.82171403 | 7.532502026 |
| 25 | O  | 6.871228934 | 6.210132434 | 13.20908158 | 65 | Al | 0.965303281 | 9.036498717 | 7.532373349 |
| 26 | O  | 2.736885988 | 8.988838642 | 13.14216677 | 66 | O  | 2.831860466 | 11.7306655  | 7.51420212  |
| 27 | O  | 2.741041227 | 11.86523787 | 13.13535327 | 67 | O  | 2.831864497 | 9.126636862 | 7.51561919  |
| 28 | O  | 2.782920301 | 6.222952842 | 13.09456965 | 68 | Al | 4.038160289 | 10.42871434 | 7.493484337 |
| 29 | Al | 3.768118938 | 10.42853308 | 13.08024287 | 69 | O  | 6.826463701 | 6.224233383 | 7.411161809 |
| 30 | Al | 0.747467799 | 6.221339232 | 13.03689598 | 70 | Al | 0.685070292 | 6.225089337 | 7.327325442 |
| 31 | Al | 6.862019352 | 10.43725213 | 11.919757   | 71 | Al | 6.815229381 | 10.42898019 | 6.520916553 |
| 32 | O  | 0.734097839 | 10.43100263 | 11.90459692 | 72 | Al | 3.047631334 | 4.717999949 | 6.482125782 |
| 33 | Al | 2.921203377 | 4.765228626 | 11.81259603 | 73 | Al | 3.047426    | 7.73188467  | 6.482152005 |
| 34 | Al | 2.922557719 | 7.681544205 | 11.81389749 | 74 | O  | 0.530892277 | 10.42927351 | 6.328595031 |
| 35 | O  | 0.982397037 | 7.54824739  | 11.79594813 | 75 | O  | 1.230128908 | 7.625164605 | 6.298976939 |
| 36 | O  | 0.983462629 | 4.897560533 | 11.80011436 | 76 | O  | 1.230177096 | 4.824973315 | 6.299190993 |
| 37 | O  | 4.987349764 | 10.43071883 | 11.75114413 | 77 | Al | 5.451383541 | 6.224973069 | 6.223253162 |
| 38 | Al | 5.836864829 | 6.221335323 | 11.73458342 | 78 | O  | 5.155624679 | 10.42816997 | 6.166904223 |
| 39 | O  | 4.76347025  | 4.819790064 | 11.66714058 | 79 | O  | 4.590735582 | 7.614114546 | 5.710286596 |
| 40 | O  | 4.765020004 | 7.625674538 | 11.66481599 | 80 | O  | 4.591994685 | 4.834539635 | 5.712021495 |
|    |    |             |             |             | 81 | H  | 2.806638591 | 7.947539002 | 16.45448189 |

**Table S7(b). NHOH(1) in Fig. 7(b)**

| #  |    | X           | Y            | Z             | #  |    | X            | Y            | Z            |
|----|----|-------------|--------------|---------------|----|----|--------------|--------------|--------------|
| 1  | O  | 3.214172562 | 11.777429290 | 16.458243842  | 41 | O  | 3.011044836  | 11.818348751 | 10.501753097 |
| 2  | O  | 3.214205950 | 9.049845288  | 16.458261131  | 42 | O  | 3.011064275  | 9.008906833  | 10.501748356 |
| 3  | O  | 2.621020675 | 6.209494301  | 16.013700679  | 43 | Al | 1.938512690  | 10.413623377 | 10.427870173 |
| 4  | Al | 2.180633227 | 10.413626256 | 16.145155977  | 44 | O  | 2.788966796  | 6.209481380  | 10.418568297 |
| 5  | O  | 6.545127838 | 9.006970687  | 15.868008441  | 45 | O  | 6.798161987  | 9.087125538  | 10.370323076 |
| 6  | O  | 6.545108294 | 11.820332634 | 15.868011297  | 46 | O  | 6.798147862  | 11.740160555 | 10.370321553 |
| 7  | O  | 7.249964817 | 6.209513708  | 15.844655134  | 47 | Al | 4.848633331  | 11.864908727 | 10.345972922 |
| 8  | Al | 4.725292572 | 11.903468467 | 15.648514830  | 48 | Al | 4.848652691  | 8.962362597  | 10.345976131 |
| 9  | Al | 4.725317682 | 8.923814573  | 15.648519671  | 49 | O  | 7.047431468  | 6.209503370  | 10.259530102 |
| 10 | Al | 0.964094011 | 6.209478515  | 15.631847034  | 50 | Al | 0.921529247  | 6.209471631  | 10.255292819 |
| 11 | Al | 7.063180642 | 10.413654977 | 14.8213111456 | 51 | Al | 7.030640132  | 10.413644747 | 9.121455742  |
| 12 | O  | 0.942787476 | 10.413621086 | 14.751854495  | 52 | Al | 4.003593958  | 6.209486709  | 9.101294270  |
| 13 | Al | 3.738051375 | 6.209497456  | 14.675709585  | 53 | O  | 4.992808234  | 10.413631296 | 9.077338844  |
| 14 | O  | 4.944443562 | 7.508924166  | 14.644461384  | 54 | O  | 5.057373278  | 7.633930779  | 9.022622238  |
| 15 | O  | 4.944453108 | 4.910079756  | 14.644460954  | 55 | O  | 5.057387012  | 4.785051852  | 9.022620860  |
| 16 | Al | 6.811667155 | 7.603503485  | 14.630850737  | 56 | O  | 0.898275717  | 10.413608801 | 8.964262461  |
| 17 | Al | 6.811681359 | 4.815513179  | 14.630848489  | 57 | Al | 6.880866828  | 4.747207788  | 8.969021864  |
| 18 | O  | 4.787311749 | 10.413640454 | 14.563888340  | 58 | Al | 6.880850440  | 7.671795609  | 8.969023472  |
| 19 | O  | 0.714466463 | 7.545540373  | 14.382911677  | 59 | O  | 0.678915450  | 7.470982870  | 8.799552265  |
| 20 | O  | 0.714477910 | 4.873410765  | 14.382917614  | 60 | O  | 0.678923309  | 4.947949755  | 8.799554874  |
| 21 | O  | 7.150130729 | 9.144337011  | 13.343888874  | 61 | O  | 7.119655115  | 11.751022729 | 7.772004880  |
| 22 | O  | 7.150118180 | 11.682968834 | 13.343889191  | 62 | O  | 7.119666321  | 9.076262299  | 7.772002700  |
| 23 | Al | 0.961292925 | 8.972750409  | 13.221482109  | 63 | O  | 3.142159460  | 6.209477236  | 7.539425325  |
| 24 | Al | 0.961280276 | 11.854495483 | 13.221486830  | 64 | Al | 1.018531147  | 11.807519505 | 7.521146151  |
| 25 | O  | 6.934536930 | 6.209511523  | 13.192133697  | 65 | Al | 1.018543200  | 9.019700311  | 7.521142917  |
| 26 | O  | 2.784153019 | 8.988000806  | 13.131110952  | 66 | O  | 2.884844342  | 11.715573020 | 7.497568506  |
| 27 | O  | 2.784138178 | 11.839255381 | 13.131109511  | 67 | O  | 2.884858105  | 9.111663716  | 7.497569668  |
| 28 | O  | 2.837654972 | 6.209485912  | 13.076483012  | 68 | Al | 4.092045011  | 10.413622576 | 7.477150725  |
| 29 | Al | 3.833173833 | 10.413629043 | 13.058669881  | 69 | O  | 6.871589646  | 6.209492926  | 7.387354198  |
| 30 | Al | 0.800481658 | 6.209477121  | 13.024398263  | 70 | Al | 0.720104224  | 6.209464597  | 7.306039539  |
| 31 | Al | 6.915657841 | 10.413651983 | 11.900854334  | 71 | Al | 6.867864505  | 10.413642354 | 6.511111808  |
| 32 | O  | 0.787345492 | 10.413620502 | 11.900653180  | 72 | Al | 3.100498380  | 4.703081712  | 6.466749311  |
| 33 | Al | 2.977153955 | 4.753807588  | 11.809105646  | 73 | Al | 3.100476582  | 7.715868942  | 6.466742927  |
| 34 | Al | 2.977136584 | 7.665161062  | 11.809100914  | 74 | O  | 0.583807103  | 10.413606239 | 6.313735513  |
| 35 | O  | 1.036750270 | 7.536310061  | 11.780185235  | 75 | O  | 1.283701467  | 7.607074024  | 6.283185721  |
| 36 | O  | 1.036766064 | 4.882632791  | 11.780194806  | 76 | O  | 1.283722609  | 4.811861373  | 6.283191123  |
| 37 | O  | 5.042762131 | 10.413634856 | 11.725622581  | 77 | Al | 5.485683571  | 6.209487221  | 6.213357266  |
| 38 | Al | 5.889156734 | 6.209502125  | 11.732996097  | 78 | O  | 5.209745060  | 10.413636520 | 6.148794244  |
| 39 | O  | 4.817376420 | 4.805788149  | 11.645712234  | 79 | O  | 4.635691495  | 7.599063420  | 5.676208591  |
| 40 | O  | 4.817360609 | 7.613204201  | 11.645719544  | 80 | O  | 4.635707408  | 4.819898343  | 5.676209399  |
|    |    |             |              |               | 81 | N  | 1.238085876  | 10.413560727 | 17.887928256 |
|    |    |             |              |               | 82 | H  | 1.858462015  | 10.413444957 | 18.708324313 |
|    |    |             |              |               | 83 | O  | -0.063147875 | 10.413665824 | 18.231241914 |
|    |    |             |              |               | 84 | H  | -0.141291501 | 10.413600248 | 19.209698289 |

**Table S7(c). NO+2H in Fig. 7(c)**

| #  |    | X           | Y           | Z           | #  |    | X           | Y           | Z           |
|----|----|-------------|-------------|-------------|----|----|-------------|-------------|-------------|
| 1  | O  | 3.042428079 | 11.82974609 | 16.3969831  | 41 | O  | 3.008177947 | 11.82796203 | 10.5218233  |
| 2  | O  | 3.041974374 | 8.997686438 | 16.39695806 | 42 | O  | 3.008178471 | 8.999146331 | 10.52176635 |
| 3  | Al | 1.90043435  | 10.41393351 | 16.2476505  | 43 | O  | 2.793285342 | 6.209425649 | 10.46810843 |
| 4  | O  | 2.561309928 | 6.208705961 | 16.10593619 | 44 | Al | 1.946019227 | 10.41355576 | 10.44142059 |
| 5  | Al | 4.851642229 | 9.05460455  | 15.88029241 | 45 | O  | 6.791660024 | 11.7389263  | 10.38910868 |
| 6  | Al | 4.851557949 | 11.77264991 | 15.87983486 | 46 | O  | 6.791673653 | 9.0882258   | 10.38909257 |
| 7  | O  | 7.200232316 | 6.209481166 | 15.86335453 | 47 | Al | 4.84499296  | 11.86301065 | 10.37567162 |
| 8  | O  | 6.679372364 | 9.008863992 | 15.85256481 | 48 | Al | 4.845007781 | 8.96412677  | 10.37562096 |
| 9  | O  | 6.679220237 | 11.81842129 | 15.85242739 | 49 | O  | 7.049969724 | 6.209437798 | 10.29472069 |
| 10 | Al | 0.879804479 | 6.209342982 | 15.65666726 | 50 | Al | 0.922092593 | 6.209429006 | 10.28427155 |
| 11 | O  | 4.896250528 | 7.559699042 | 14.87624252 | 51 | Al | 7.025323786 | 10.4136102  | 9.137616071 |
| 12 | O  | 4.896354941 | 4.859311079 | 14.87603741 | 52 | Al | 3.993001521 | 6.209450746 | 9.131094576 |
| 13 | Al | 7.114760784 | 10.4135996  | 14.80236006 | 53 | O  | 4.987333787 | 10.41360292 | 9.103530704 |
| 14 | Al | 3.759076832 | 6.209479326 | 14.74294548 | 54 | O  | 5.054199667 | 4.791379946 | 9.060552708 |
| 15 | O  | 0.946951783 | 10.41368079 | 14.68953776 | 55 | O  | 5.054189168 | 7.627536053 | 9.060471744 |
| 16 | Al | 6.774643537 | 7.612522761 | 14.6599883  | 56 | Al | 6.879434583 | 4.749128285 | 8.990532042 |
| 17 | Al | 6.774621152 | 4.806472166 | 14.65986423 | 57 | Al | 6.879422456 | 7.669781432 | 8.990497047 |
| 18 | O  | 4.76337844  | 10.41347113 | 14.62955139 | 58 | O  | 0.895985917 | 10.41358687 | 8.983517844 |
| 19 | O  | 0.719895892 | 7.542290265 | 14.41312576 | 59 | O  | 0.680896637 | 7.473297371 | 8.83788275  |
| 20 | O  | 0.719974618 | 4.876575443 | 14.4129237  | 60 | O  | 0.680893707 | 4.945578814 | 8.837805553 |
| 21 | O  | 7.143802863 | 9.134652204 | 13.32915652 | 61 | O  | 7.117111568 | 11.75314647 | 7.792938542 |
| 22 | O  | 7.1439049   | 11.69235658 | 13.32891731 | 62 | O  | 7.117133265 | 9.074072879 | 7.792890877 |
| 23 | O  | 6.886196204 | 6.209497304 | 13.24876675 | 63 | O  | 3.103891188 | 6.209489675 | 7.585221258 |
| 24 | Al | 0.955042249 | 11.85770027 | 13.21056146 | 64 | Al | 1.016755966 | 11.8046773  | 7.543714619 |
| 25 | Al | 0.955079953 | 8.969426065 | 13.21055205 | 65 | Al | 1.016769709 | 9.022586057 | 7.543707194 |
| 26 | O  | 2.777698234 | 11.84083491 | 13.14710993 | 66 | O  | 2.882990207 | 9.112382832 | 7.527614344 |
| 27 | O  | 2.777698376 | 8.986181712 | 13.14707875 | 67 | O  | 2.882965925 | 11.71489897 | 7.52759173  |
| 28 | O  | 2.863024846 | 6.209417503 | 13.1450333  | 68 | Al | 4.089565672 | 10.41365291 | 7.501819124 |
| 29 | Al | 3.830638181 | 10.41349137 | 13.11802113 | 69 | O  | 6.880240137 | 6.209504923 | 7.433906362 |
| 30 | Al | 0.800558611 | 6.20941263  | 13.06419905 | 70 | Al | 0.742471968 | 6.209473131 | 7.34762966  |
| 31 | Al | 6.906543076 | 10.41349874 | 11.9052895  | 71 | Al | 6.867500468 | 10.41364838 | 6.526633611 |
| 32 | O  | 0.78483154  | 10.41350961 | 11.89819898 | 72 | Al | 3.098368935 | 7.714518355 | 6.500430069 |
| 33 | Al | 2.985030938 | 4.751029628 | 11.84476963 | 73 | Al | 3.098365098 | 4.704477908 | 6.50038425  |
| 34 | Al | 2.984988635 | 7.6677625   | 11.84468349 | 74 | O  | 0.583142866 | 10.41363721 | 6.337951315 |
| 35 | O  | 1.037500442 | 7.526312258 | 11.81962239 | 75 | O  | 1.281214484 | 7.608785246 | 6.314897654 |
| 36 | O  | 1.037520612 | 4.892479426 | 11.8195809  | 76 | O  | 1.281237059 | 4.810201694 | 6.314838728 |
| 37 | O  | 5.028593698 | 10.41351241 | 11.75683497 | 77 | Al | 5.508205188 | 6.209523951 | 6.243579338 |
| 38 | Al | 5.887491789 | 6.209414164 | 11.74921953 | 78 | O  | 5.207367147 | 10.41367862 | 6.17541018  |
| 39 | O  | 4.822218805 | 4.801445924 | 11.69216735 | 79 | O  | 4.644958112 | 7.597956721 | 5.736050571 |
| 40 | O  | 4.822164529 | 7.61730685  | 11.69202956 | 80 | O  | 4.644927424 | 4.821122807 | 5.735981053 |
|    |    |             |             |             | 81 | N  | 0.722799151 | 10.41409173 | 17.64368215 |
|    |    |             |             |             | 82 | O  | 0.641672901 | 10.41702613 | 18.86662174 |
|    |    |             |             |             | 83 | H  | 2.713073415 | 12.76961004 | 16.46610359 |
|    |    |             |             |             | 84 | H  | 2.712637921 | 8.058152819 | 16.46757862 |

**Table S7(d). NHOH(2) in Fig. 7(d)**

| #  |    | X           | Y           | Z           | #  |    | X           | Y           | Z           |
|----|----|-------------|-------------|-------------|----|----|-------------|-------------|-------------|
| 1  | O  | 3.17577714  | 11.81962865 | 16.56879816 | 41 | O  | 2.964757189 | 11.81642937 | 10.49960787 |
| 2  | O  | 3.175754908 | 9.007551408 | 16.56870835 | 42 | O  | 2.964762264 | 9.010794882 | 10.49955418 |
| 3  | O  | 2.619081858 | 6.209449634 | 15.90525622 | 43 | Al | 1.88882082  | 10.4136164  | 10.43182347 |
| 4  | Al | 2.391835763 | 10.41360964 | 15.94257377 | 44 | O  | 2.730997181 | 6.209471991 | 10.40932801 |
| 5  | O  | 6.49001568  | 9.02507577  | 15.86800797 | 45 | O  | 6.7488829   | 9.086660181 | 10.38015615 |
| 6  | O  | 6.490023827 | 11.80219245 | 15.86806056 | 46 | O  | 6.748845763 | 11.74063186 | 10.38016959 |
| 7  | O  | 7.114920202 | 6.209508331 | 15.78373056 | 47 | Al | 4.804621319 | 11.86719074 | 10.34802763 |
| 8  | Al | 4.681185861 | 11.94097624 | 15.7084999  | 48 | Al | 4.80463178  | 8.960084572 | 10.34800874 |
| 9  | Al | 4.681182787 | 8.886277675 | 15.70843238 | 49 | O  | 6.99719833  | 6.209503116 | 10.25024427 |
| 10 | Al | 0.878957804 | 6.209467695 | 15.79641252 | 50 | Al | 0.861718642 | 6.20946539  | 10.27231671 |
| 11 | Al | 7.133790331 | 10.41364167 | 14.89230271 | 51 | Al | 6.985840682 | 10.413648   | 9.131609603 |
| 12 | O  | 0.960862171 | 10.41361568 | 14.80000863 | 52 | Al | 3.952540303 | 6.209487257 | 9.097548096 |
| 13 | Al | 3.73020711  | 6.209472996 | 14.59844649 | 53 | O  | 4.945362743 | 10.413644   | 9.087992093 |
| 14 | O  | 4.898369642 | 7.539577174 | 14.60981925 | 54 | O  | 5.007865918 | 7.634268509 | 9.019402822 |
| 15 | O  | 4.898399282 | 4.879393593 | 14.60987541 | 55 | O  | 5.007869464 | 4.784712251 | 9.019423879 |
| 16 | Al | 6.765259788 | 7.601228422 | 14.61485135 | 56 | O  | 0.849738802 | 10.41361347 | 8.969517241 |
| 17 | Al | 6.765278907 | 4.817759993 | 14.61486718 | 57 | Al | 6.832173634 | 4.749921112 | 8.963428397 |
| 18 | O  | 4.484103725 | 10.41363871 | 14.68534797 | 58 | Al | 6.832164303 | 7.66908453  | 8.963431089 |
| 19 | O  | 0.664106945 | 7.544901502 | 14.42220073 | 59 | O  | 0.631416652 | 7.472922207 | 8.806748708 |
| 20 | O  | 0.664072146 | 4.87402199  | 14.42221943 | 60 | O  | 0.631414339 | 4.946010162 | 8.806756064 |
| 21 | O  | 7.117736725 | 9.16022726  | 13.37383119 | 61 | O  | 7.071400298 | 11.74947838 | 7.778285853 |
| 22 | O  | 7.117735889 | 11.66704054 | 13.37385351 | 62 | O  | 7.071439555 | 9.077818791 | 7.778278536 |
| 23 | Al | 0.910275942 | 8.936697815 | 13.20450024 | 63 | O  | 3.084583787 | 6.209475314 | 7.539740282 |
| 24 | Al | 0.910241771 | 11.89054184 | 13.204498   | 64 | Al | 0.971516602 | 11.80776029 | 7.525948346 |
| 25 | O  | 6.897441215 | 6.209510362 | 13.1651698  | 65 | Al | 0.971528266 | 9.019465691 | 7.525937959 |
| 26 | O  | 2.726097931 | 8.980803364 | 13.11895039 | 66 | O  | 2.837658082 | 11.71573802 | 7.502160137 |
| 27 | O  | 2.726068338 | 11.84647149 | 13.11897519 | 67 | O  | 2.837670719 | 9.111509753 | 7.502158413 |
| 28 | O  | 2.800274559 | 6.209488626 | 13.03928538 | 68 | Al | 4.044433225 | 10.41362836 | 7.484519238 |
| 29 | Al | 3.764949966 | 10.41364648 | 13.05915293 | 69 | O  | 6.827581258 | 6.209487498 | 7.390399117 |
| 30 | Al | 0.773109845 | 6.209475776 | 13.08678804 | 70 | Al | 0.683677094 | 6.209465502 | 7.315733823 |
| 31 | Al | 6.87030733  | 10.41363649 | 11.92101235 | 71 | Al | 6.82053686  | 10.41364708 | 6.51658986  |
| 32 | O  | 0.738210134 | 10.41362478 | 11.90604069 | 72 | Al | 3.053239445 | 4.701314747 | 6.467621903 |
| 33 | Al | 2.927424277 | 4.75719289  | 11.79450294 | 73 | Al | 3.053228674 | 7.717643809 | 6.467627223 |
| 34 | Al | 2.927410698 | 7.661781003 | 11.79449382 | 74 | O  | 0.536692176 | 10.41361275 | 6.319987367 |
| 35 | O  | 0.983300048 | 7.529982564 | 11.79940692 | 75 | O  | 1.235130274 | 7.609020065 | 6.287683429 |
| 36 | O  | 0.983322233 | 4.888964161 | 11.79936174 | 76 | O  | 1.235131145 | 4.809911903 | 6.287689155 |
| 37 | O  | 4.99920937  | 10.41362426 | 11.75636816 | 77 | Al | 5.44393065  | 6.209482646 | 6.211647876 |
| 38 | Al | 5.84813645  | 6.209499663 | 11.72156213 | 78 | O  | 5.161975284 | 10.41364772 | 6.157065617 |
| 39 | O  | 4.768998392 | 4.809149307 | 11.63765437 | 79 | O  | 4.590802235 | 7.599228775 | 5.681440436 |
| 40 | O  | 4.768981442 | 7.609833563 | 11.63762727 | 80 | O  | 4.590803519 | 4.819745042 | 5.681418517 |
|    |    |             |             |             | 81 | N  | 1.037034873 | 6.209499255 | 17.7722104  |
|    |    |             |             |             | 82 | H  | 2.00199282  | 6.209517796 | 18.13014285 |
|    |    |             |             |             | 83 | O  | 0.097182363 | 6.209493307 | 18.74834528 |
|    |    |             |             |             | 84 | H  | 0.549957283 | 6.209515488 | 19.61843861 |

**Table S7(e). 2NHOH in Fig. 7(e)**

| #  |    | X           | Y           | Z           | #  |    | X           | Y           | Z           |
|----|----|-------------|-------------|-------------|----|----|-------------|-------------|-------------|
| 1  | O  | 3.157808557 | 11.78299988 | 16.46132095 | 45 | O  | 6.727415559 | 9.085324769 | 10.34353456 |
| 2  | O  | 3.157939853 | 9.044468916 | 16.46147908 | 46 | O  | 6.727401251 | 11.74199838 | 10.34354015 |
| 3  | O  | 2.598046581 | 6.209552265 | 15.89061598 | 47 | Al | 4.777670563 | 11.86479873 | 10.31909989 |
| 4  | Al | 2.122591204 | 10.41367863 | 16.13334543 | 48 | Al | 4.777685228 | 8.962507994 | 10.31910046 |
| 5  | O  | 6.46378459  | 9.006629841 | 15.84101159 | 49 | O  | 6.973371253 | 6.209519777 | 10.22573724 |
| 6  | O  | 6.463727208 | 11.82074933 | 15.84097052 | 50 | Al | 0.839948883 | 6.20948676  | 10.25327816 |
| 7  | O  | 7.089605632 | 6.209543115 | 15.76447405 | 51 | Al | 6.95994645  | 10.41366102 | 9.09914847  |
| 8  | Al | 4.65266643  | 11.90846165 | 15.6072443  | 52 | Al | 3.932693744 | 6.20950476  | 9.079682676 |
| 9  | Al | 4.652718834 | 8.918900176 | 15.60729868 | 53 | O  | 4.923694189 | 10.41365043 | 9.049825051 |
| 10 | Al | 0.845914617 | 6.209502362 | 15.75792231 | 54 | O  | 4.985158227 | 7.635594567 | 8.988434769 |
| 11 | Al | 7.005937474 | 10.41369097 | 14.81158432 | 55 | O  | 4.985171714 | 4.783420929 | 8.988420638 |
| 12 | O  | 0.882553756 | 10.41365658 | 14.74528726 | 56 | O  | 0.82609008  | 10.41363108 | 8.939877446 |
| 13 | Al | 3.707885362 | 6.209540969 | 14.56455633 | 57 | Al | 6.809491412 | 4.746189088 | 8.944849786 |
| 14 | O  | 4.87302023  | 7.53331149  | 14.56295247 | 58 | Al | 6.809476344 | 7.672849096 | 8.944856333 |
| 15 | O  | 4.873025262 | 4.885765293 | 14.56291647 | 59 | O  | 0.60690127  | 7.472428678 | 8.777548765 |
| 16 | Al | 6.740792994 | 7.600030428 | 14.58807475 | 60 | O  | 0.606914077 | 4.946535522 | 8.777551528 |
| 17 | Al | 6.740799008 | 4.819053684 | 14.5880641  | 61 | O  | 7.047800567 | 11.75093877 | 7.745414408 |
| 18 | O  | 4.686999006 | 10.41366188 | 14.54259233 | 62 | O  | 7.047825381 | 9.076382438 | 7.745417328 |
| 19 | O  | 0.644481414 | 7.542963628 | 14.40340013 | 63 | O  | 3.07966525  | 6.209495056 | 7.511062826 |
| 20 | O  | 0.644494853 | 4.876040209 | 14.40340745 | 64 | Al | 0.947373777 | 11.80840395 | 7.501527034 |
| 21 | O  | 7.085464288 | 9.147409805 | 13.32636551 | 65 | Al | 0.947390834 | 9.018850729 | 7.501523162 |
| 22 | O  | 7.085456125 | 11.67994731 | 13.32635814 | 66 | O  | 2.814238399 | 11.71473328 | 7.471228383 |
| 23 | Al | 0.892864963 | 8.961122893 | 13.2167881  | 67 | O  | 2.814252555 | 9.112539377 | 7.471234689 |
| 24 | Al | 0.892856322 | 11.86616177 | 13.21680313 | 68 | Al | 4.020853711 | 10.41364601 | 7.454403207 |
| 25 | O  | 6.877499753 | 6.209530585 | 13.14211217 | 69 | O  | 6.800744277 | 6.209514164 | 7.360225083 |
| 26 | O  | 2.713163455 | 8.985382686 | 13.10261218 | 70 | Al | 0.648348962 | 6.209483153 | 7.289246767 |
| 27 | O  | 2.713148334 | 11.8419108  | 13.10261143 | 71 | Al | 6.798824187 | 10.41366225 | 6.489619191 |
| 28 | O  | 2.772259287 | 6.209507886 | 13.01656659 | 72 | Al | 3.028348584 | 4.703396322 | 6.443867223 |
| 29 | Al | 3.757284329 | 10.41365059 | 13.02737841 | 73 | Al | 3.028326336 | 7.715595539 | 6.443867786 |
| 30 | Al | 0.749142961 | 6.209500506 | 13.05356676 | 74 | O  | 0.514586809 | 10.41362354 | 6.288921439 |
| 31 | Al | 6.851634132 | 10.41367767 | 11.88458115 | 75 | O  | 1.212474094 | 7.605653899 | 6.260926904 |
| 32 | O  | 0.717146871 | 10.41363585 | 11.88330007 | 76 | O  | 1.212491568 | 4.813314549 | 6.260932023 |
| 33 | Al | 2.898187391 | 4.75128302  | 11.77177512 | 77 | Al | 5.408904703 | 6.209509032 | 6.198903704 |
| 34 | Al | 2.898169648 | 7.667725054 | 11.77177236 | 78 | O  | 5.138677886 | 10.41364604 | 6.120687573 |
| 35 | O  | 0.963166859 | 7.532570603 | 11.77563377 | 79 | O  | 4.56177534  | 7.597583594 | 5.644556638 |
| 36 | O  | 0.963183076 | 4.886419498 | 11.7756374  | 80 | O  | 4.561793418 | 4.821419061 | 5.64455385  |
| 37 | O  | 4.974294011 | 10.41365686 | 11.69925798 | 81 | N  | 1.164218371 | 10.4131202  | 17.86352579 |
| 38 | Al | 5.822588378 | 6.209515891 | 11.70031097 | 82 | H  | 1.767694085 | 10.41186036 | 18.69448397 |
| 39 | O  | 4.742108128 | 4.810311798 | 11.60574174 | 83 | O  | -0.14945334 | 10.41436284 | 18.18585564 |
| 40 | O  | 4.742094745 | 7.608714295 | 11.60575162 | 84 | H  | -0.24250556 | 10.41338981 | 19.16145252 |
| 41 | O  | 2.937980196 | 11.81577804 | 10.47071407 | 85 | N  | 1.073566318 | 6.209398468 | 17.73415811 |
| 42 | O  | 2.937995166 | 9.011507726 | 10.47070839 | 86 | H  | 2.06552526  | 6.209198839 | 18.00991153 |
| 43 | Al | 1.86054017  | 10.41364084 | 10.41100992 | 87 | O  | 0.211390584 | 6.209450603 | 18.79708148 |
| 44 | O  | 2.706759696 | 6.209504294 | 10.38281379 | 88 | H  | 0.746675934 | 6.209197844 | 19.61710995 |

**Table S7(f). NHOH+NO in Fig. 7(f)**

| #  |    | X           | Y            | Z            | #  |    | X           | Y            | Z            |
|----|----|-------------|--------------|--------------|----|----|-------------|--------------|--------------|
| 1  | O  | 3.197314487 | 11.805503856 | 16.626601703 | 41 | O  | 2.970011134 | 11.818491744 | 10.490077267 |
| 2  | O  | 3.038656512 | 8.950453641  | 16.513412708 | 42 | O  | 2.970164161 | 9.007934572  | 10.484316366 |
| 3  | O  | 2.613330879 | 6.179402374  | 15.900894644 | 43 | Al | 1.897017977 | 10.413990837 | 10.421784053 |
| 4  | Al | 2.443805220 | 10.447299908 | 15.852245486 | 44 | O  | 2.736855422 | 6.207795202  | 10.401921881 |
| 5  | O  | 6.530966287 | 9.045099018  | 15.823779376 | 45 | O  | 6.750100279 | 9.087159916  | 10.372921024 |
| 6  | O  | 6.490785302 | 11.799994401 | 15.844276137 | 46 | O  | 6.749143214 | 11.739461473 | 10.373606075 |
| 7  | O  | 7.112410369 | 6.219009944  | 15.769429578 | 47 | Al | 4.807297604 | 11.867995854 | 10.343084530 |
| 8  | Al | 4.684954253 | 11.960811928 | 15.737339480 | 48 | Al | 4.808408169 | 8.959255524  | 10.343899326 |
| 9  | Al | 4.696691701 | 8.865132232  | 15.842612831 | 49 | O  | 7.001077383 | 6.207997374  | 10.241761890 |
| 10 | Al | 0.875289140 | 6.216256385  | 15.787434430 | 50 | Al | 0.866538078 | 6.206092344  | 10.264598115 |
| 11 | Al | 7.166966725 | 10.426639943 | 14.868678992 | 51 | Al | 6.989624992 | 10.412905852 | 9.124319180  |
| 12 | O  | 0.981029347 | 10.447591649 | 14.742099464 | 52 | Al | 3.955804046 | 6.207816858  | 9.088774287  |
| 13 | Al | 3.729736463 | 6.222443124  | 14.600919658 | 53 | O  | 4.948395061 | 10.413412928 | 9.085373701  |
| 14 | O  | 4.890789271 | 7.557529395  | 14.671949706 | 54 | O  | 5.011895067 | 7.632241492  | 9.014153653  |
| 15 | O  | 4.893109406 | 4.881108617  | 14.610646918 | 55 | O  | 5.011802673 | 4.784274392  | 9.009775290  |
| 16 | Al | 6.761049632 | 7.617993113  | 14.601673897 | 56 | O  | 0.853524447 | 10.412650841 | 8.960797204  |
| 17 | Al | 6.761934316 | 4.826712927  | 14.598955705 | 57 | Al | 6.834562337 | 4.750179600  | 8.953415269  |
| 18 | O  | 4.362393165 | 10.396561462 | 14.770348601 | 58 | Al | 6.835780049 | 7.668921015  | 8.957112392  |
| 19 | O  | 0.667662243 | 7.549352035  | 14.404762188 | 59 | O  | 0.634586898 | 7.471788584  | 8.798961054  |
| 20 | O  | 0.659963335 | 4.876381460  | 14.409944551 | 60 | O  | 0.634079690 | 4.944269224  | 8.799328978  |
| 21 | O  | 7.122230390 | 9.164721902  | 13.345878085 | 61 | O  | 7.073580661 | 11.748225841 | 7.771130267  |
| 22 | O  | 7.115198128 | 11.673472167 | 13.355834456 | 62 | O  | 7.073736882 | 9.076847905  | 7.770986256  |
| 23 | Al | 0.911828054 | 8.935090310  | 13.176945734 | 63 | O  | 3.085128727 | 6.209116513  | 7.532767891  |
| 24 | Al | 0.918919751 | 11.886351531 | 13.197524921 | 64 | Al | 0.974673677 | 11.806889431 | 7.518800319  |
| 25 | O  | 6.889475819 | 6.216468183  | 13.158815816 | 65 | Al | 0.974826978 | 9.018660921  | 7.518689785  |
| 26 | O  | 2.725798666 | 8.976529489  | 13.096700414 | 66 | O  | 2.841052004 | 11.715287181 | 7.495175785  |
| 27 | O  | 2.739335168 | 11.844125148 | 13.110238097 | 67 | O  | 2.841178535 | 9.110952206  | 7.494238707  |
| 28 | O  | 2.809967018 | 6.212229021  | 13.032365683 | 68 | Al | 4.047026340 | 10.413084510 | 7.481438705  |
| 29 | Al | 3.771765574 | 10.401408433 | 13.075925224 | 69 | O  | 6.831641284 | 6.207986178  | 7.381757558  |
| 30 | Al | 0.775490502 | 6.210146219  | 13.078759207 | 70 | Al | 0.687702180 | 6.209283358  | 7.308142641  |
| 31 | Al | 6.875117252 | 10.419264054 | 11.907756983 | 71 | Al | 6.823909459 | 10.412741231 | 6.509592039  |
| 32 | O  | 0.743094888 | 10.417441859 | 11.887488869 | 72 | Al | 3.055903410 | 4.700742111  | 6.460653895  |
| 33 | Al | 2.934751404 | 4.755855647  | 11.790769925 | 73 | Al | 3.056262862 | 7.717155957  | 6.459997332  |
| 34 | Al | 2.931112303 | 7.658977104  | 11.781281682 | 74 | O  | 0.539124125 | 10.412952092 | 6.312433714  |
| 35 | O  | 0.984655684 | 7.525309147  | 11.783039154 | 75 | O  | 1.239340253 | 7.608437264  | 6.279304517  |
| 36 | O  | 0.989762740 | 4.888163831  | 11.791895785 | 76 | O  | 1.238660762 | 4.809263271  | 6.280473712  |
| 37 | O  | 5.001703876 | 10.413582045 | 11.768183244 | 77 | Al | 5.448835354 | 6.208678220  | 6.203509885  |
| 38 | Al | 5.851181474 | 6.210568304  | 11.709490536 | 78 | O  | 5.163844065 | 10.413659392 | 6.153222195  |
| 39 | O  | 4.774955582 | 4.810369237  | 11.628787341 | 79 | O  | 4.594537404 | 7.598429653  | 5.675770057  |
| 40 | O  | 4.774317185 | 7.612178491  | 11.635532722 | 80 | O  | 4.593859974 | 4.819433974  | 5.675348202  |
|    |    |             |              |              | 81 | N  | 1.019627839 | 6.180946674  | 17.762908184 |
|    |    |             |              |              | 82 | H  | 1.978540520 | 6.118452317  | 18.130669240 |
|    |    |             |              |              | 83 | O  | 0.072407832 | 6.235832334  | 18.731543511 |
|    |    |             |              |              | 84 | H  | 0.516286743 | 6.207471834  | 19.605526308 |
|    |    |             |              |              | 85 | N  | 4.773050454 | 9.184720212  | 17.968229355 |
|    |    |             |              |              | 86 | O  | 4.574627005 | 8.651589047  | 18.990972672 |

**Table S8(a). NHOH+2H in Fig. 8(a)**

| #  |    | X           | Y            | Z            | #  |    | X            | Y            | Z            |
|----|----|-------------|--------------|--------------|----|----|--------------|--------------|--------------|
| 1  | O  | 3.048797459 | 11.818724133 | 16.366002481 | 41 | O  | 3.048084537  | 11.791798706 | 10.536959036 |
| 2  | O  | 3.083747823 | 9.001346441  | 16.324766891 | 42 | O  | 3.046203465  | 8.958648205  | 10.521555870 |
| 3  | O  | 2.616792076 | 5.930682674  | 16.097906139 | 43 | Al | 1.986208600  | 10.375445156 | 10.455222432 |
| 4  | Al | 2.036173787 | 10.339380570 | 16.131529433 | 44 | O  | 2.835431706  | 6.174000062  | 10.479213114 |
| 5  | O  | 6.692359426 | 8.995950242  | 15.900866452 | 45 | O  | 6.834042342  | 9.053206027  | 10.391402902 |
| 6  | O  | 6.744438647 | 11.779743910 | 15.872234128 | 46 | O  | 6.833665729  | 11.704635257 | 10.388792805 |
| 7  | O  | 7.281237434 | 6.188104762  | 15.912027739 | 47 | Al | 4.883149787  | 11.828961324 | 10.387316166 |
| 8  | Al | 4.877916868 | 11.710305392 | 15.915092699 | 48 | Al | 4.880437536  | 8.928743065  | 10.381628489 |
| 9  | Al | 4.781675331 | 9.025224475  | 15.883959890 | 49 | O  | 7.091154298  | 6.175003431  | 10.311071349 |
| 10 | Al | 0.965591255 | 6.178236243  | 15.665490760 | 50 | Al | 0.966570069  | 6.174033749  | 10.304420723 |
| 11 | Al | 7.049097022 | 10.385966041 | 14.738335236 | 51 | Al | 7.064826088  | 10.379347390 | 9.141697009  |
| 12 | O  | 0.952273396 | 10.377160064 | 14.643067506 | 52 | Al | 4.038766693  | 6.176371690  | 9.150578763  |
| 13 | Al | 3.814091653 | 6.170778710  | 14.784907356 | 53 | O  | 5.030133476  | 10.379360602 | 9.105654126  |
| 14 | O  | 4.963373685 | 7.516474783  | 14.892938149 | 54 | O  | 5.097946109  | 7.595294403  | 9.062499333  |
| 15 | O  | 4.965687670 | 4.818515614  | 14.923474845 | 55 | O  | 5.096126056  | 4.755833357  | 9.068875760  |
| 16 | Al | 6.818886172 | 7.580169463  | 14.703041953 | 56 | O  | 0.938461470  | 10.379365546 | 8.988517370  |
| 17 | Al | 6.830581381 | 4.782446271  | 14.699728136 | 57 | Al | 6.921180386  | 4.710794772  | 9.011786127  |
| 18 | O  | 4.901467572 | 10.390936857 | 14.597555329 | 58 | Al | 6.922115128  | 7.637195780  | 9.010154299  |
| 19 | O  | 0.774892934 | 7.509080732  | 14.433712963 | 59 | O  | 0.720707028  | 7.437738194  | 8.846683580  |
| 20 | O  | 0.729845090 | 4.839903277  | 14.410433622 | 60 | O  | 0.720309518  | 4.911388220  | 8.845783019  |
| 21 | O  | 7.169076381 | 9.081079854  | 13.338512140 | 61 | O  | 7.157121341  | 11.720097266 | 7.796172378  |
| 22 | O  | 7.162075024 | 11.657995333 | 13.309876084 | 62 | O  | 7.158070938  | 9.038260718  | 7.797810610  |
| 23 | Al | 1.001544569 | 8.946751800  | 13.243955750 | 63 | O  | 3.167669354  | 6.175254972  | 7.591136333  |
| 24 | Al | 0.983693501 | 11.813915829 | 13.226416134 | 64 | Al | 1.057536894  | 11.770732968 | 7.555922340  |
| 25 | O  | 6.925690583 | 6.182867757  | 13.276047712 | 65 | Al | 1.058080323  | 8.987417528  | 7.555664825  |
| 26 | O  | 2.829350385 | 8.967829609  | 13.146091225 | 66 | O  | 2.925131776  | 11.679484980 | 7.532736781  |
| 27 | O  | 2.818690686 | 11.802026683 | 13.165558130 | 67 | O  | 2.925018129  | 9.079102285  | 7.529124878  |
| 28 | O  | 2.916560219 | 6.178150267  | 13.166193156 | 68 | Al | 4.130691382  | 10.379119528 | 7.511010708  |
| 29 | Al | 3.891287056 | 10.386893589 | 13.127544824 | 69 | O  | 6.918045643  | 6.174891293  | 7.439260122  |
| 30 | Al | 0.835054906 | 6.175950851  | 13.079004813 | 70 | Al | 0.769974226  | 6.174492815  | 7.358336281  |
| 31 | Al | 6.952209544 | 10.370958903 | 11.900311442 | 71 | Al | 6.912417341  | 10.378963424 | 6.536543556  |
| 32 | O  | 0.817567671 | 10.373905575 | 11.898352820 | 72 | Al | 3.138178095  | 4.672114411  | 6.512547992  |
| 33 | Al | 3.026642219 | 4.718284093  | 11.869512303 | 73 | Al | 3.137541207  | 7.677422170  | 6.510374353  |
| 34 | Al | 3.027618391 | 7.634553700  | 11.865097715 | 74 | O  | 0.625981414  | 10.378949089 | 6.342899021  |
| 35 | O  | 1.081572951 | 7.492222111  | 11.836100599 | 75 | O  | 1.322337826  | 7.570384202  | 6.325842615  |
| 36 | O  | 1.081443288 | 4.860861606  | 11.829044335 | 76 | O  | 1.323253113  | 4.778970593  | 6.325834908  |
| 37 | O  | 5.071781436 | 10.376538422 | 11.750612645 | 77 | Al | 5.538411750  | 6.174704793  | 6.266240976  |
| 38 | Al | 5.929599380 | 6.176075760  | 11.777212445 | 78 | O  | 5.249129210  | 10.377513107 | 6.176667819  |
| 39 | O  | 4.864812492 | 4.766308210  | 11.702677733 | 79 | O  | 4.679618118  | 7.559811673  | 5.729626580  |
| 40 | O  | 4.864370566 | 7.582663677  | 11.693146557 | 80 | O  | 4.681475547  | 4.786878164  | 5.733738874  |
|    |    |             |              |              | 81 | N  | 0.586161446  | 10.253043599 | 17.419599055 |
|    |    |             |              |              | 82 | H  | -0.294200358 | 9.742212010  | 17.161535717 |
|    |    |             |              |              | 83 | O  | 0.451130601  | 11.057083414 | 18.498099457 |
|    |    |             |              |              | 84 | H  | -0.492602140 | 11.029373560 | 18.769863703 |
|    |    |             |              |              | 85 | H  | 5.001209668  | 10.446702346 | 17.092098062 |
|    |    |             |              |              | 86 | H  | 2.751687488  | 12.805191775 | 16.300839390 |



**Table S8(b). NH<sub>2</sub> in Fig. 8(b)**

| #  |    | X           | Y            | Z            | #  |    | X            | Y            | Z            |
|----|----|-------------|--------------|--------------|----|----|--------------|--------------|--------------|
| 1  | O  | 3.204636511 | 11.744349093 | 16.452446012 | 41 | O  | 3.010777007  | 11.822136311 | 10.512140034 |
| 2  | O  | 3.198850426 | 9.077867298  | 16.468123563 | 42 | O  | 3.010586724  | 9.011606369  | 10.514719716 |
| 3  | O  | 2.626640219 | 6.206441462  | 16.035197961 | 43 | Al | 1.936109013  | 10.416931895 | 10.451573172 |
| 4  | Al | 2.068524195 | 10.412718325 | 16.274228274 | 44 | O  | 2.789495579  | 6.213029121  | 10.436449242 |
| 5  | O  | 6.536181249 | 9.007105498  | 15.881884006 | 45 | O  | 6.798318200  | 9.090093283  | 10.383439325 |
| 6  | O  | 6.550833418 | 11.806738200 | 15.895119572 | 46 | O  | 6.798233966  | 11.745376902 | 10.384403891 |
| 7  | O  | 7.242031764 | 6.205328593  | 15.861825473 | 47 | Al | 4.848194762  | 11.868795994 | 10.367104041 |
| 8  | Al | 4.726764864 | 11.887888713 | 15.666677936 | 48 | Al | 4.847816961  | 8.966026815  | 10.367061344 |
| 9  | Al | 4.714384324 | 8.929278705  | 15.664213247 | 49 | O  | 7.046790458  | 6.213788739  | 10.279574360 |
| 10 | Al | 0.953644471 | 6.211796124  | 15.665565596 | 50 | Al | 0.921570368  | 6.213424518  | 10.286917757 |
| 11 | Al | 7.054011026 | 10.405457926 | 14.821289951 | 51 | Al | 7.029876153  | 10.418245015 | 9.138663235  |
| 12 | O  | 0.940332294 | 10.417476725 | 14.713961663 | 52 | Al | 4.006462049  | 6.213853172  | 9.124906445  |
| 13 | Al | 3.745744128 | 6.201381507  | 14.685352388 | 53 | O  | 4.996138585  | 10.417959932 | 9.093190398  |
| 14 | O  | 4.937410957 | 7.507937740  | 14.667511238 | 54 | O  | 5.059079705  | 7.638847124  | 9.036978116  |
| 15 | O  | 4.947030508 | 4.901119849  | 14.671822289 | 55 | O  | 5.059307493  | 4.789091105  | 9.037479252  |
| 16 | Al | 6.807711810 | 7.601483643  | 14.654781433 | 56 | O  | 0.898753233  | 10.418402218 | 8.980665359  |
| 17 | Al | 6.814886912 | 4.809784810  | 14.653180814 | 57 | Al | 6.883437102  | 4.749435219  | 8.996026232  |
| 18 | O  | 4.810944964 | 10.411269242 | 14.572145827 | 58 | Al | 6.883385163  | 7.678634478  | 8.995127582  |
| 19 | O  | 0.718049921 | 7.545346598  | 14.411712348 | 59 | O  | 0.680192147  | 7.477631477  | 8.821452822  |
| 20 | O  | 0.720167439 | 4.874476360  | 14.411243876 | 60 | O  | 0.680153927  | 4.951090967  | 8.820784777  |
| 21 | O  | 7.145129653 | 9.136902353  | 13.353766338 | 61 | O  | 7.117647229  | 11.756842572 | 7.786127730  |
| 22 | O  | 7.143324084 | 11.690372689 | 13.359680210 | 62 | O  | 7.117760173  | 9.080563175  | 7.785447630  |
| 23 | Al | 0.967981486 | 8.989250404  | 13.265247874 | 63 | O  | 3.145771480  | 6.215021808  | 7.559067712  |
| 24 | Al | 0.969134989 | 11.837661307 | 13.267614115 | 64 | Al | 1.020309128  | 11.813719890 | 7.544289162  |
| 25 | O  | 6.934167976 | 6.209433122  | 13.215569015 | 65 | Al | 1.020134209  | 9.024668615  | 7.544267501  |
| 26 | O  | 2.790755930 | 8.987578736  | 13.144372711 | 66 | O  | 2.888609552  | 11.721416811 | 7.514037525  |
| 27 | O  | 2.791370760 | 11.843491150 | 13.141924269 | 67 | O  | 2.888436448  | 9.117526285  | 7.514761917  |
| 28 | O  | 2.840455112 | 6.209500226  | 13.096700093 | 68 | Al | 4.090194050  | 10.419406914 | 7.504916964  |
| 29 | Al | 3.835137332 | 10.415587415 | 13.082423012 | 69 | O  | 6.879177732  | 6.215229860  | 7.408897319  |
| 30 | Al | 0.802247684 | 6.210317660  | 13.049288378 | 70 | Al | 0.723692716  | 6.215026034  | 7.332703836  |
| 31 | Al | 6.919855676 | 10.415689183 | 11.921010124 | 71 | Al | 6.877916456  | 10.419113605 | 6.528432410  |
| 32 | O  | 0.784805675 | 10.416275481 | 11.914196403 | 72 | Al | 3.098446468  | 4.710883280  | 6.487856044  |
| 33 | Al | 2.971977086 | 4.753771602  | 11.825318319 | 73 | Al | 3.098613343  | 7.719699444  | 6.488771674  |
| 34 | Al | 2.973798086 | 7.669408804  | 11.827615791 | 74 | O  | 0.590575413  | 10.419321307 | 6.334161602  |
| 35 | O  | 1.038161682 | 7.535440029  | 11.802166144 | 75 | O  | 1.285664650  | 7.611897126  | 6.306568944  |
| 36 | O  | 1.036994404 | 4.888108704  | 11.800046067 | 76 | O  | 1.285484788  | 4.818575610  | 6.306151127  |
| 37 | O  | 5.042679327 | 10.416759889 | 11.739840283 | 77 | Al | 5.498828780  | 6.215730412  | 6.244570118  |
| 38 | Al | 5.890150140 | 6.212287626  | 11.756208668 | 78 | O  | 5.210209108  | 10.419798136 | 6.165136800  |
| 39 | O  | 4.815957953 | 4.810894712  | 11.661493388 | 79 | O  | 4.642039895  | 7.603282085  | 5.703054821  |
| 40 | O  | 4.816886950 | 7.614443381  | 11.661168828 | 80 | O  | 4.641903243  | 4.828586482  | 5.702333590  |
|    |    |             |              |              | 81 | N  | 0.771847390  | 10.421508656 | 17.615935281 |
|    |    |             |              |              | 82 | H  | 0.932317629  | 10.056883821 | 18.554030064 |
|    |    |             |              |              | 83 | H  | -0.172277377 | 10.804550296 | 17.532770769 |

**Table S8(c). NO/NH<sub>2</sub> in Fig. 8(c)**

| #  |    | X           | Y            | Z            | #  |    | X            | Y            | Z            |
|----|----|-------------|--------------|--------------|----|----|--------------|--------------|--------------|
| 1  | O  | 3.150377212 | 9.129021831  | 16.452810138 | 41 | O  | 3.000339652  | 11.857452073 | 10.514740679 |
| 2  | O  | 3.206977160 | 11.837406776 | 16.452164385 | 42 | O  | 3.000550612  | 9.047252515  | 10.513064021 |
| 3  | Al | 2.119995470 | 10.499767317 | 16.170201841 | 43 | Al | 1.927343559  | 10.452061553 | 10.438045365 |
| 4  | O  | 2.620719601 | 6.258078916  | 16.022680032 | 44 | O  | 2.778365911  | 6.248025609  | 10.434943443 |
| 5  | O  | 6.557603096 | 11.842981482 | 15.897340783 | 45 | O  | 6.787821475  | 11.778429207 | 10.377894966 |
| 6  | O  | 6.520976107 | 9.058388049  | 15.887394732 | 46 | O  | 6.787511321  | 9.126904594  | 10.377233744 |
| 7  | O  | 7.239600511 | 6.244513339  | 15.863428571 | 47 | Al | 4.837870210  | 11.905097556 | 10.357456697 |
| 8  | Al | 4.679481247 | 8.968477008  | 15.675216231 | 48 | Al | 4.837550414  | 9.000354184  | 10.356790321 |
| 9  | Al | 4.724333462 | 11.945385692 | 15.663808459 | 49 | O  | 7.037700001  | 6.249041430  | 10.274692778 |
| 10 | Al | 0.957550320 | 6.246733161  | 15.663476782 | 50 | Al | 0.910344034  | 6.249878104  | 10.274195301 |
| 11 | Al | 7.006334253 | 10.439364963 | 14.780151838 | 51 | Al | 7.018104224  | 10.452873625 | 9.126371967  |
| 12 | O  | 0.924045287 | 10.455269209 | 14.706405818 | 52 | Al | 3.990870173  | 6.248482955  | 9.115659265  |
| 13 | Al | 3.735068804 | 6.243756818  | 14.687240455 | 53 | O  | 4.982414227  | 10.452872895 | 9.087637449  |
| 14 | O  | 4.929068599 | 7.553291794  | 14.674807706 | 54 | O  | 5.047103540  | 4.825665182  | 9.034786328  |
| 15 | O  | 4.954762701 | 4.949247518  | 14.665422421 | 55 | O  | 5.046914701  | 7.671352520  | 9.034333327  |
| 16 | Al | 6.796425705 | 7.641817005  | 14.659955530 | 56 | Al | 6.871824749  | 4.787966259  | 8.979571336  |
| 17 | Al | 6.815991722 | 4.859169213  | 14.636099259 | 57 | Al | 6.871449495  | 7.709130623  | 8.978355724  |
| 18 | O  | 4.804254670 | 10.459125245 | 14.573069406 | 58 | O  | 0.886947424  | 10.452711353 | 8.973724217  |
| 19 | O  | 0.699346506 | 7.586071884  | 14.406910296 | 59 | O  | 0.670203088  | 4.985959051  | 8.816993186  |
| 20 | O  | 0.705173575 | 4.908719668  | 14.405152976 | 60 | O  | 0.670111271  | 7.511961610  | 8.816567564  |
| 21 | O  | 7.125996848 | 11.728464563 | 13.349432224 | 61 | O  | 7.108778745  | 11.791624366 | 7.779993062  |
| 22 | O  | 7.129061957 | 9.175860876  | 13.344364925 | 62 | O  | 7.108621106  | 9.114399804  | 7.779633425  |
| 23 | Al | 0.955338143 | 9.021739496  | 13.250137073 | 63 | O  | 3.117900774  | 6.248853965  | 7.559103858  |
| 24 | Al | 0.952024069 | 11.884508226 | 13.237959508 | 64 | Al | 1.008622055  | 11.846288417 | 7.532837849  |
| 25 | O  | 6.924273553 | 6.249540467  | 13.210342292 | 65 | Al | 1.008494678  | 9.059481749  | 7.532422896  |
| 26 | O  | 2.779285519 | 11.880116008 | 13.145569948 | 66 | O  | 2.875353516  | 11.754716456 | 7.511434701  |
| 27 | O  | 2.781201492 | 9.028091562  | 13.143826497 | 67 | O  | 2.875175627  | 9.151377427  | 7.510639777  |
| 28 | O  | 2.832003166 | 6.247328165  | 13.092683884 | 68 | Al | 4.080964776  | 10.452963123 | 7.489450425  |
| 29 | Al | 3.827270857 | 10.454791134 | 13.071171906 | 69 | O  | 6.867207221  | 6.249163439  | 7.407263694  |
| 30 | Al | 0.794349539 | 6.252003434  | 13.046282465 | 70 | Al | 0.721762909  | 6.248723364  | 7.326784616  |
| 31 | O  | 0.773946418 | 10.453725168 | 11.906233078 | 71 | Al | 6.860251212  | 10.453144786 | 6.517305617  |
| 32 | Al | 6.909083192 | 10.450701763 | 11.895225867 | 72 | Al | 3.090079774  | 4.743390104  | 6.482360858  |
| 33 | Al | 2.966984320 | 7.706087585  | 11.823673721 | 73 | Al | 3.089975901  | 7.754073516  | 6.482132010  |
| 34 | Al | 2.966481401 | 4.792843248  | 11.822419260 | 74 | O  | 0.575675158  | 10.453092061 | 6.324943604  |
| 35 | O  | 1.026534729 | 4.922787113  | 11.801660334 | 75 | O  | 1.273584463  | 4.850634059  | 6.298115226  |
| 36 | O  | 1.029368933 | 7.575703813  | 11.800326990 | 76 | O  | 1.273607596  | 7.646879791  | 6.297901330  |
| 37 | Al | 5.881147630 | 6.249266923  | 11.747192879 | 77 | Al | 5.487355891  | 6.248756552  | 6.228644674  |
| 38 | O  | 5.033274060 | 10.452942235 | 11.734484133 | 78 | O  | 5.199385879  | 10.453121336 | 6.159726416  |
| 39 | O  | 4.808191589 | 7.652323976  | 11.659005378 | 79 | O  | 4.630846777  | 4.859785675  | 5.702111122  |
| 40 | O  | 4.808253560 | 4.845474854  | 11.658881844 | 80 | O  | 4.630601437  | 7.637400422  | 5.701719835  |
|    |    |             |              |              | 81 | N  | 0.775655590  | 10.969517308 | 17.567405259 |
|    |    |             |              |              | 82 | H  | 0.710164512  | 10.371605045 | 18.399188656 |
|    |    |             |              |              | 83 | H  | -0.172746932 | 11.168181111 | 17.184776851 |
|    |    |             |              |              | 84 | N  | 1.237266220  | 12.475833538 | 18.092353921 |
|    |    |             |              |              | 85 | O  | 1.726848675  | 12.444872565 | 19.152093113 |

**Table S8(d).  $\underline{2}\text{NH}_2$  in Fig. 8(d)**

| #  |    | X           | Y           | Z           | #  |    | X            | Y           | Z           |
|----|----|-------------|-------------|-------------|----|----|--------------|-------------|-------------|
| 1  | O  | 3.181897067 | 11.66405418 | 16.47720347 | 41 | O  | 2.943544287  | 11.77198705 | 10.49000365 |
| 2  | O  | 3.135178115 | 9.023650793 | 16.45223243 | 42 | O  | 2.942904408  | 8.966434613 | 10.48953323 |
| 3  | O  | 2.597840003 | 6.009252907 | 15.93331732 | 43 | Al | 1.864281145  | 10.36965296 | 10.43995153 |
| 4  | Al | 1.994970668 | 10.37114431 | 16.26645171 | 44 | O  | 2.71499986   | 6.166826277 | 10.40799208 |
| 5  | O  | 6.462521504 | 8.948731588 | 15.85415977 | 45 | O  | 6.733910572  | 9.043770768 | 10.36138902 |
| 6  | O  | 6.485437531 | 11.74743379 | 15.87571811 | 46 | O  | 6.733584296  | 11.70135235 | 10.36345655 |
| 7  | O  | 7.094195124 | 6.150703726 | 15.78805059 | 47 | Al | 4.782809382  | 11.82273828 | 10.34654741 |
| 8  | Al | 4.677034887 | 11.83660065 | 15.633423   | 48 | Al | 4.782307946  | 8.920810158 | 10.34613256 |
| 9  | Al | 4.647418671 | 8.873690549 | 15.62303738 | 49 | O  | 6.979097486  | 6.168279852 | 10.25353895 |
| 10 | Al | 0.849372432 | 6.26992278  | 15.8219289  | 50 | Al | 0.846705479  | 6.168187492 | 10.29273802 |
| 11 | Al | 6.994143922 | 10.35219238 | 14.80477842 | 51 | Al | 6.964074494  | 10.37340195 | 9.120213171 |
| 12 | O  | 0.878800973 | 10.36645421 | 14.71279783 | 52 | Al | 3.941418838  | 6.168752606 | 9.108427949 |
| 13 | Al | 3.714762208 | 6.121523608 | 14.59683722 | 53 | O  | 4.932061976  | 10.37293161 | 9.071147184 |
| 14 | O  | 4.856022209 | 7.463874567 | 14.61153108 | 54 | O  | 4.993190078  | 7.595200108 | 9.010967996 |
| 15 | O  | 4.895751103 | 4.815948226 | 14.5940452  | 55 | O  | 4.992957859  | 4.742129979 | 9.011508073 |
| 16 | Al | 6.73023285  | 7.541499005 | 14.60644725 | 56 | O  | 0.83250844   | 10.37356145 | 8.962467557 |
| 17 | Al | 6.770004824 | 4.756882242 | 14.62490216 | 57 | Al | 6.818021669  | 4.703675579 | 8.979244774 |
| 18 | O  | 4.732875345 | 10.35675735 | 14.54849559 | 58 | Al | 6.818219933  | 7.63447293  | 8.976445224 |
| 19 | O  | 0.658830796 | 7.506851871 | 14.42531617 | 59 | O  | 0.613776113  | 7.433936892 | 8.805570042 |
| 20 | O  | 0.647837901 | 4.839685341 | 14.43256972 | 60 | O  | 0.61339714   | 4.905856186 | 8.804391144 |
| 21 | O  | 7.081107524 | 9.089372988 | 13.33511531 | 61 | O  | 7.051235474  | 11.71269309 | 7.76558996  |
| 22 | O  | 7.084203999 | 11.63672496 | 13.34418832 | 62 | O  | 7.05144963   | 9.036373846 | 7.763542069 |
| 23 | Al | 0.903506195 | 8.933955244 | 13.25319198 | 63 | O  | 3.09440207   | 6.17187312  | 7.533435149 |
| 24 | Al | 0.905436238 | 11.80760253 | 13.27516257 | 64 | Al | 0.955636255  | 11.7717196  | 7.530875957 |
| 25 | O  | 6.879742494 | 6.172246411 | 13.17302243 | 65 | Al | 0.955321382  | 8.980014712 | 7.530266175 |
| 26 | O  | 2.726358533 | 8.941798245 | 13.12080801 | 66 | O  | 2.825004607  | 11.67839109 | 7.493572943 |
| 27 | O  | 2.726277641 | 11.80036935 | 13.12508391 | 67 | O  | 2.824498709  | 9.074936481 | 7.492604802 |
| 28 | O  | 2.782652281 | 6.161718298 | 13.04993037 | 68 | Al | 4.024763391  | 10.3763371  | 7.487654674 |
| 29 | Al | 3.766788049 | 10.3711338  | 13.05581071 | 69 | O  | 6.811995732  | 6.172454812 | 7.388879763 |
| 30 | Al | 0.757974031 | 6.159781519 | 13.08805421 | 70 | Al | 0.6548413    | 6.171480824 | 7.321319073 |
| 31 | Al | 6.861634295 | 10.37079237 | 11.90573391 | 71 | Al | 6.816522518  | 10.375874   | 6.511034821 |
| 32 | O  | 0.721345717 | 10.36982139 | 11.90284385 | 72 | Al | 3.031190986  | 4.667843804 | 6.468483917 |
| 33 | Al | 2.897963104 | 4.705209825 | 11.79557989 | 73 | Al | 3.031136133  | 7.676410238 | 6.469015435 |
| 34 | Al | 2.903243131 | 7.624247855 | 11.8005911  | 74 | O  | 0.528194145  | 10.37624317 | 6.316918005 |
| 35 | O  | 0.973353427 | 7.484194727 | 11.80428415 | 75 | O  | 1.21956749   | 7.566380219 | 6.290827198 |
| 36 | O  | 0.970378341 | 4.84599074  | 11.79834635 | 76 | O  | 1.219529737  | 4.77717742  | 6.29054503  |
| 37 | O  | 4.980007385 | 10.37156347 | 11.71741437 | 77 | Al | 5.427365541  | 6.173458752 | 6.23480146  |
| 38 | Al | 5.828717272 | 6.166043244 | 11.72976733 | 78 | O  | 5.145899402  | 10.37805154 | 6.143365653 |
| 39 | O  | 4.746075579 | 4.768851233 | 11.62879752 | 79 | O  | 4.573697564  | 7.55945951  | 5.675089184 |
| 40 | O  | 4.748538711 | 7.565456116 | 11.62957393 | 80 | O  | 4.574024678  | 4.787168574 | 5.675524844 |
|    |    |             |             |             | 81 | N  | 0.739609328  | 10.34202454 | 17.63922573 |
|    |    |             |             |             | 82 | H  | 1.021875964  | 10.55412476 | 18.59546423 |
|    |    |             |             |             | 83 | H  | -0.246293201 | 10.57865338 | 17.51701044 |
|    |    |             |             |             | 84 | N  | 1.007464303  | 7.21248103  | 17.50567402 |
|    |    |             |             |             | 85 | H  | 1.672542738  | 6.907813438 | 18.22184428 |
|    |    |             |             |             | 86 | H  | 0.749303593  | 8.205123428 | 17.66285481 |

Table S8(e).  $\text{NH}_2+\text{H}$  in Fig. 8(e)

| #  |    | X           | Y            | Z            | #  |    | X            | Y            | Z            |
|----|----|-------------|--------------|--------------|----|----|--------------|--------------|--------------|
| 1  | O  | 3.263880053 | 11.608539982 | 16.541826174 | 41 | O  | 3.012326183  | 11.834125954 | 10.513599115 |
| 2  | O  | 3.205138338 | 8.926819677  | 16.420235554 | 42 | O  | 3.013266753  | 9.028345353  | 10.519102818 |
| 3  | O  | 2.609240653 | 6.414755862  | 16.033683215 | 43 | Al | 1.936614101  | 10.431392773 | 10.440489719 |
| 4  | Al | 2.016329604 | 10.398850656 | 16.373638790 | 44 | O  | 2.789741360  | 6.225921399  | 10.438760410 |
| 5  | O  | 6.561268847 | 9.030330727  | 15.872114040 | 45 | O  | 6.797949805  | 9.103974870  | 10.387054470 |
| 6  | O  | 6.536069743 | 11.828014783 | 15.871491267 | 46 | O  | 6.798149210  | 11.757259768 | 10.388412931 |
| 7  | O  | 7.221715318 | 6.226222229  | 15.846568286 | 47 | Al | 4.851078508  | 11.880963145 | 10.363111281 |
| 8  | Al | 4.717945500 | 11.889641932 | 15.694650355 | 48 | Al | 4.852910164  | 8.979694636  | 10.364249452 |
| 9  | Al | 4.782907639 | 8.970028942  | 15.606649436 | 49 | O  | 7.047891876  | 6.226004528  | 10.276187086 |
| 10 | Al | 0.925955085 | 6.228285889  | 15.662340682 | 50 | Al | 0.919009638  | 6.226344373  | 10.273186162 |
| 11 | Al | 7.131528175 | 10.442575308 | 14.852584316 | 51 | Al | 7.029610330  | 10.430589879 | 9.136687101  |
| 12 | O  | 0.967633194 | 10.417581009 | 14.727956096 | 52 | Al | 4.000009919  | 6.227049073  | 9.113886331  |
| 13 | Al | 3.740027105 | 6.233357934  | 14.664825958 | 53 | O  | 4.993514352  | 10.430662868 | 9.095456670  |
| 14 | O  | 4.950099814 | 7.524892543  | 14.652676133 | 54 | O  | 5.056599547  | 7.649248252  | 9.041778885  |
| 15 | O  | 4.905103083 | 4.918000955  | 14.709475514 | 55 | O  | 5.057035149  | 4.804914269  | 9.043788926  |
| 16 | Al | 6.824158365 | 7.620204706  | 14.620556911 | 56 | O  | 0.896124995  | 10.430595341 | 8.979814789  |
| 17 | Al | 6.790035214 | 4.822069110  | 14.652075577 | 57 | Al | 6.881423657  | 4.766869313  | 8.978950775  |
| 18 | O  | 4.761267355 | 10.428376135 | 14.575643328 | 58 | Al | 6.881353988  | 7.687550686  | 8.980025582  |
| 19 | O  | 0.706793674 | 7.560198913  | 14.400698249 | 59 | O  | 0.680968506  | 7.489576116  | 8.821663077  |
| 20 | O  | 0.747201997 | 4.895119090  | 14.426365094 | 60 | O  | 0.681181396  | 4.963456517  | 8.821862438  |
| 21 | O  | 7.150090600 | 9.162728191  | 13.359625642 | 61 | O  | 7.118772130  | 11.768489519 | 7.787735198  |
| 22 | O  | 7.162749002 | 11.711946846 | 13.368404232 | 62 | O  | 7.119209283  | 9.092936016  | 7.786846331  |
| 23 | Al | 0.970016410 | 9.002807603  | 13.246361113 | 63 | O  | 3.119335284  | 6.226619592  | 7.563453235  |
| 24 | Al | 0.979707748 | 11.857900742 | 13.265440108 | 64 | Al | 1.018482655  | 11.823735344 | 7.535510960  |
| 25 | O  | 6.929318015 | 6.209953214  | 13.211209608 | 65 | Al | 1.018066453  | 9.037931131  | 7.535215874  |
| 26 | O  | 2.792185406 | 8.991130469  | 13.147116070 | 66 | O  | 2.884902645  | 11.732739195 | 7.516719806  |
| 27 | O  | 2.793399301 | 11.865990473 | 13.141505705 | 67 | O  | 2.884629783  | 9.128635553  | 7.517562793  |
| 28 | O  | 2.834613579 | 6.224576554  | 13.095873302 | 68 | Al | 4.091185420  | 10.430592019 | 7.494899137  |
| 29 | Al | 3.821018170 | 10.431493242 | 13.069194839 | 69 | O  | 6.878349667  | 6.226181323  | 7.412794751  |
| 30 | Al | 0.802549552 | 6.221149499  | 13.042321446 | 70 | Al | 0.736263770  | 6.226747567  | 7.329766389  |
| 31 | Al | 6.920123239 | 10.436506272 | 11.918748785 | 71 | Al | 6.868335757  | 10.430873463 | 6.522848107  |
| 32 | O  | 0.791368505 | 10.431379359 | 11.915632750 | 72 | Al | 3.100328159  | 4.720016761  | 6.484590178  |
| 33 | Al | 2.972808653 | 4.766758771  | 11.815842312 | 73 | Al | 3.100210439  | 7.733421703  | 6.484715861  |
| 34 | Al | 2.974344618 | 7.682803118  | 11.816451825 | 74 | O  | 0.584276261  | 10.431201361 | 6.331320676  |
| 35 | O  | 1.036371987 | 7.549580244  | 11.801312057 | 75 | O  | 1.283111644  | 7.626336149  | 6.301556595  |
| 36 | O  | 1.037671109 | 4.898447524  | 11.803713258 | 76 | O  | 1.283197732  | 4.827108372  | 6.301746930  |
| 37 | O  | 5.043845457 | 10.432038953 | 11.745878430 | 77 | Al | 5.502288213  | 6.226894426  | 6.226045555  |
| 38 | Al | 5.890330536 | 6.222328930  | 11.739788169 | 78 | O  | 5.208705177  | 10.430772245 | 6.167889247  |
| 39 | O  | 4.816097024 | 4.820756253  | 11.669011651 | 79 | O  | 4.642998604  | 7.616462557  | 5.711292360  |
| 40 | O  | 4.817821062 | 7.626578076  | 11.665216476 | 80 | O  | 4.643311403  | 4.836897050  | 5.711739163  |
|    |    |             |              |              | 81 | N  | 0.810093220  | 10.155673140 | 17.667345034 |
|    |    |             |              |              | 82 | H  | 1.012154064  | 10.364270081 | 18.639807387 |
|    |    |             |              |              | 83 | H  | -0.161870191 | 9.885475678  | 17.561348044 |
|    |    |             |              |              | 84 | H  | 2.861176568  | 7.965136137  | 16.447683831 |

**Table S8(f). NH in Fig. 8(f)**

| #  |    | X           | Y            | Z            | #  |    | X            | Y            | Z            |
|----|----|-------------|--------------|--------------|----|----|--------------|--------------|--------------|
| 1  | O  | 3.201479820 | 11.770198576 | 16.457931907 | 41 | O  | 3.024114283  | 11.823711991 | 10.522750457 |
| 2  | O  | 3.209713117 | 9.082192424  | 16.477986542 | 42 | O  | 3.025104184  | 9.012140799  | 10.523783737 |
| 3  | O  | 2.641212833 | 6.221074359  | 16.041963439 | 43 | Al | 1.951039363  | 10.417448604 | 10.461562769 |
| 4  | Al | 2.103564792 | 10.422716081 | 16.257060799 | 44 | O  | 2.803366716  | 6.213517319  | 10.447146877 |
| 5  | O  | 6.558138737 | 9.020636472  | 15.908427605 | 45 | O  | 6.811806509  | 9.089108385  | 10.396063875 |
| 6  | O  | 6.556738978 | 11.822577165 | 15.897505678 | 46 | O  | 6.811640652  | 11.744274981 | 10.394842687 |
| 7  | O  | 7.256140809 | 6.218464102  | 15.870473498 | 47 | Al | 4.861651713  | 11.868298225 | 10.376731852 |
| 8  | Al | 4.731624951 | 11.904128831 | 15.680377811 | 48 | Al | 4.862841294  | 8.965625345  | 10.377937086 |
| 9  | Al | 4.731853797 | 8.939614536  | 15.685568928 | 49 | O  | 7.060662949  | 6.212324502  | 10.289775228 |
| 10 | Al | 0.968366991 | 6.213854159  | 15.676866699 | 50 | Al | 0.935324689  | 6.212445453  | 10.295982697 |
| 11 | Al | 7.073573089 | 10.422637537 | 14.841075444 | 51 | Al | 7.044991781  | 10.415900155 | 9.150408106  |
| 12 | O  | 0.960064383 | 10.424987745 | 14.719641778 | 52 | Al | 4.019916345  | 6.212079332  | 9.134864375  |
| 13 | Al | 3.760473163 | 6.217694771  | 14.694692488 | 53 | O  | 5.009319930  | 10.416165745 | 9.104691275  |
| 14 | O  | 4.956764759 | 7.522977619  | 14.683704897 | 54 | O  | 5.072910409  | 7.636805427  | 9.048626174  |
| 15 | O  | 4.956432500 | 4.913647098  | 14.678620418 | 55 | O  | 5.072782923  | 4.787174152  | 9.046845823  |
| 16 | Al | 6.825605923 | 7.612643342  | 14.664060130 | 56 | O  | 0.912776500  | 10.415419850 | 8.991816954  |
| 17 | Al | 6.824802062 | 4.821105202  | 14.665119580 | 57 | Al | 6.897036129  | 4.747806154  | 9.004466691  |
| 18 | O  | 4.817344012 | 10.418420702 | 14.592018040 | 58 | Al | 6.897067488  | 7.676161567  | 9.005590027  |
| 19 | O  | 0.733639203 | 7.552044154  | 14.421683781 | 59 | O  | 0.694085391  | 7.474862482  | 8.832373380  |
| 20 | O  | 0.732973567 | 4.880585508  | 14.421241681 | 60 | O  | 0.694152647  | 4.948187636  | 8.832717578  |
| 21 | O  | 7.158088985 | 9.144841530  | 13.374615687 | 61 | O  | 7.132267073  | 11.753186092 | 7.796735409  |
| 22 | O  | 7.158986808 | 11.695710891 | 13.368218200 | 62 | O  | 7.131973209  | 9.077441088  | 7.797351350  |
| 23 | Al | 0.981305887 | 8.991926569  | 13.270358822 | 63 | O  | 3.157251363  | 6.210580639  | 7.570295491  |
| 24 | Al | 0.981360523 | 11.848301198 | 13.269802434 | 64 | Al | 1.034067306  | 11.809076397 | 7.554496173  |
| 25 | O  | 6.947973425 | 6.216605676  | 13.224976769 | 65 | Al | 1.034148473  | 9.020270918  | 7.554840304  |
| 26 | O  | 2.804031813 | 8.991193133  | 13.153562080 | 66 | O  | 2.901723206  | 11.715685786 | 7.525272564  |
| 27 | O  | 2.804287498 | 11.846153138 | 13.151046204 | 67 | O  | 2.901930363  | 9.112430760  | 7.525744569  |
| 28 | O  | 2.855283999 | 6.215233883  | 13.105466700 | 68 | Al | 4.103839687  | 10.414173645 | 7.515894431  |
| 29 | Al | 3.849712851 | 10.418575038 | 13.095933120 | 69 | O  | 6.893648933  | 6.210676431  | 7.419946935  |
| 30 | Al | 0.816116891 | 6.215978095  | 13.060504996 | 70 | Al | 0.738686354  | 6.210586584  | 7.343497780  |
| 31 | Al | 6.931991934 | 10.420537582 | 11.933884428 | 71 | Al | 6.892385293  | 10.414732490 | 6.538632381  |
| 32 | O  | 0.797292954 | 10.417917650 | 11.923925228 | 72 | Al | 3.112223137  | 4.705519187  | 6.499611030  |
| 33 | Al | 2.988447165 | 4.756814485  | 11.836170870 | 73 | Al | 3.111689072  | 7.714967759  | 6.498743805  |
| 34 | Al | 2.987620823 | 7.671912470  | 11.836452390 | 74 | O  | 0.604814122  | 10.414371499 | 6.345212219  |
| 35 | O  | 1.051031294 | 7.538938439  | 11.811517081 | 75 | O  | 1.298709082  | 7.607451063  | 6.317328556  |
| 36 | O  | 1.051311534 | 4.891039674  | 11.812208266 | 76 | O  | 1.299185888  | 4.813322790  | 6.317671532  |
| 37 | O  | 5.056381850 | 10.418021365 | 11.752870818 | 77 | Al | 5.514070741  | 6.209789239  | 6.253700582  |
| 38 | Al | 5.904403447 | 6.213667905  | 11.765567177 | 78 | O  | 5.224353431  | 10.413365895 | 6.177111582  |
| 39 | O  | 4.831038410 | 4.811648124  | 11.670614984 | 79 | O  | 4.655815350  | 7.597380849  | 5.715075869  |
| 40 | O  | 4.830709192 | 7.615775516  | 11.672798195 | 80 | O  | 4.656900436  | 4.821092225  | 5.716610821  |
|    |    |             |              |              | 81 | N  | 0.734590134  | 10.391269165 | 17.561792032 |
|    |    |             |              |              | 82 | H  | -0.144737455 | 9.897702118  | 17.763051711 |
